# Supplementary material for: Fluorenone–thiazolidine-4-one scaffolds as antidiabetic and antioxidant agents: design, synthesis, X-ray crystal structures, and binding and computational studies
Source: Royal Society of Chemistry journal article supplement (doi:10.1039/d3nj01922e), 2023-01-01

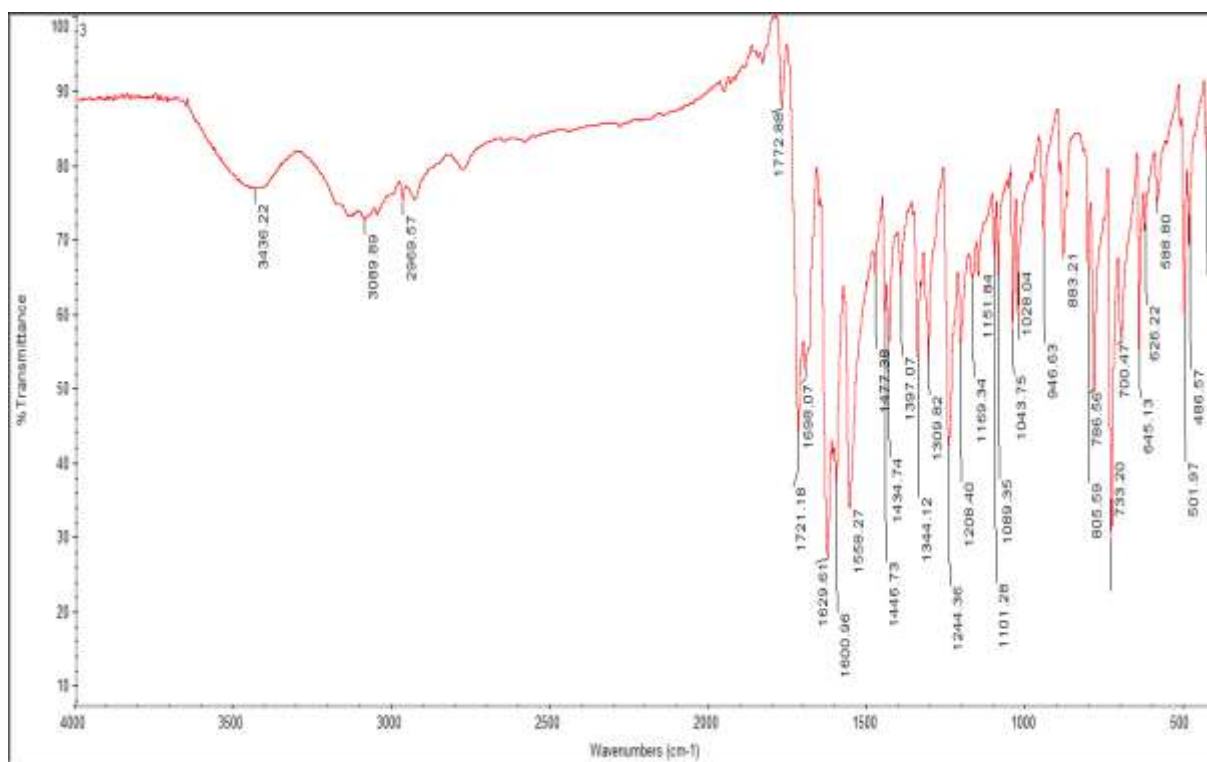

Fig.S1. FT-IR spectra of compound 3

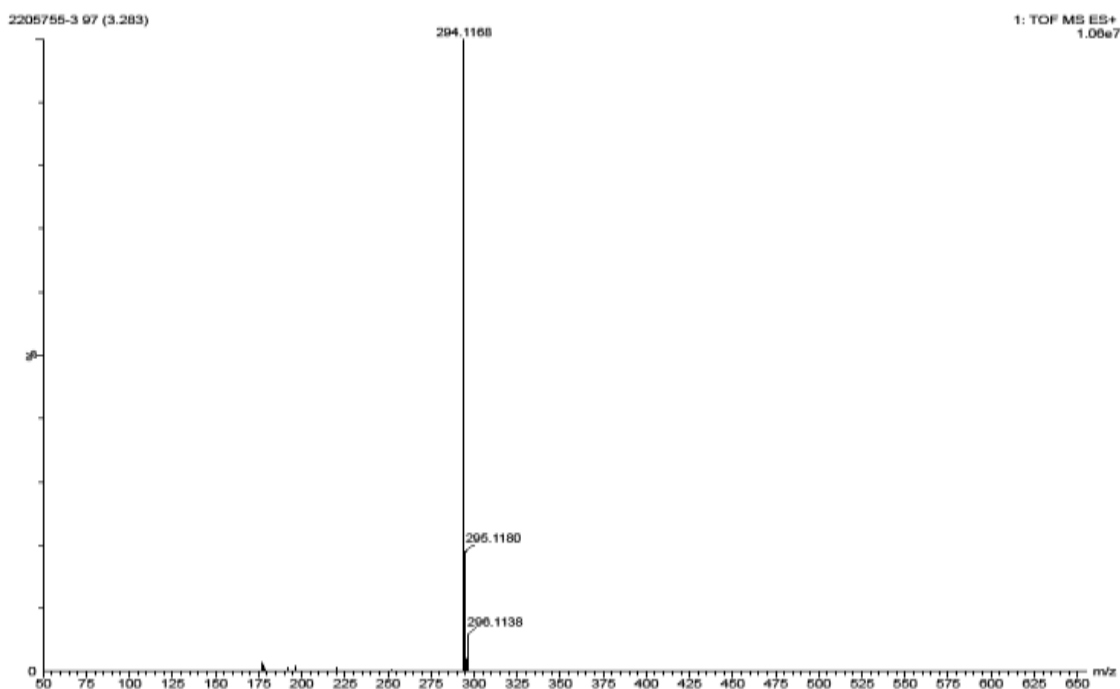

Fig.S2. Mass spectra of compound 3

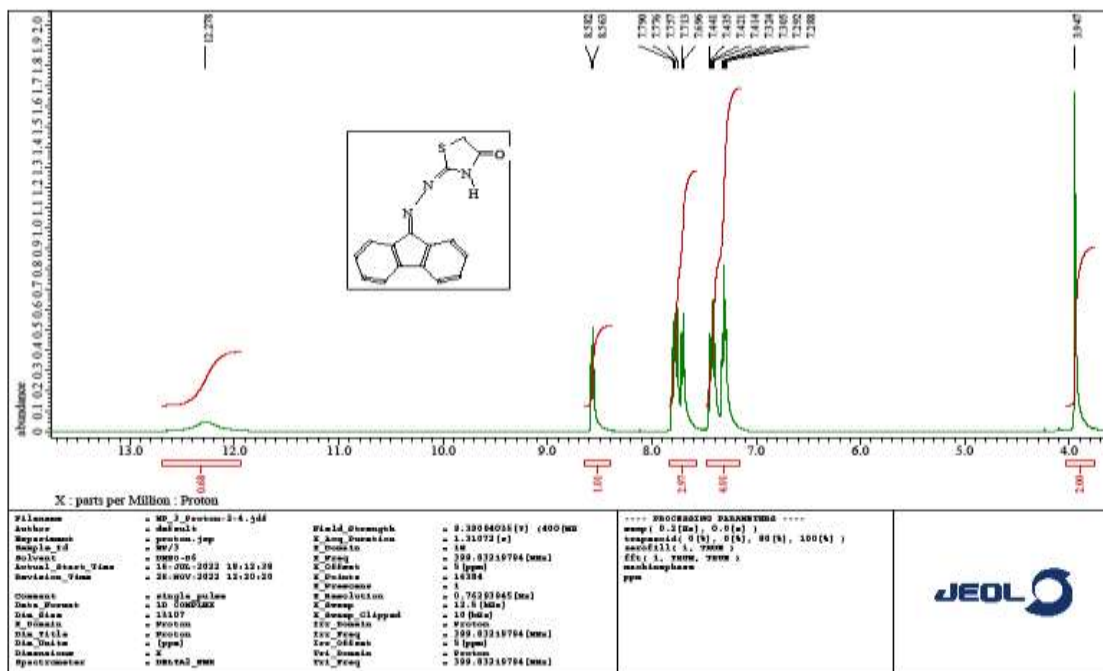

You created this PDF from an application that is not licensed to print to novaPDF printer (<http://www.novapdf.com>)

Fig.S3. <sup>1</sup>H spectra of compound 3

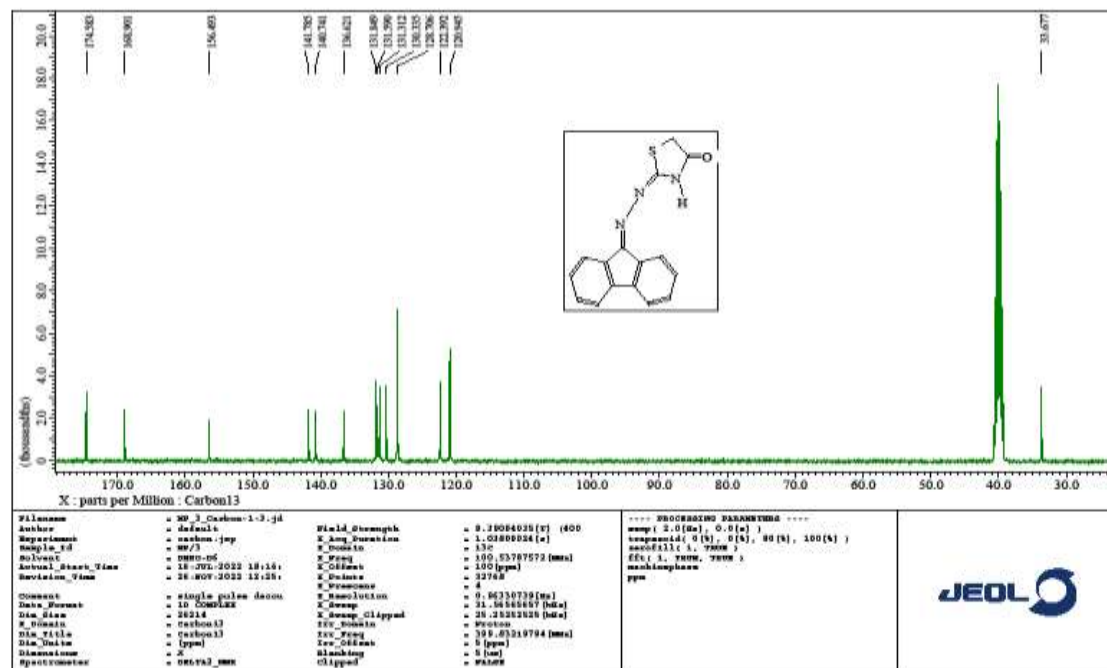

You created this PDF from an application that is not licensed to print to novaPDF printer (<http://www.novapdf.com>)

Fig.S4. <sup>13</sup>C spectra of compound 3

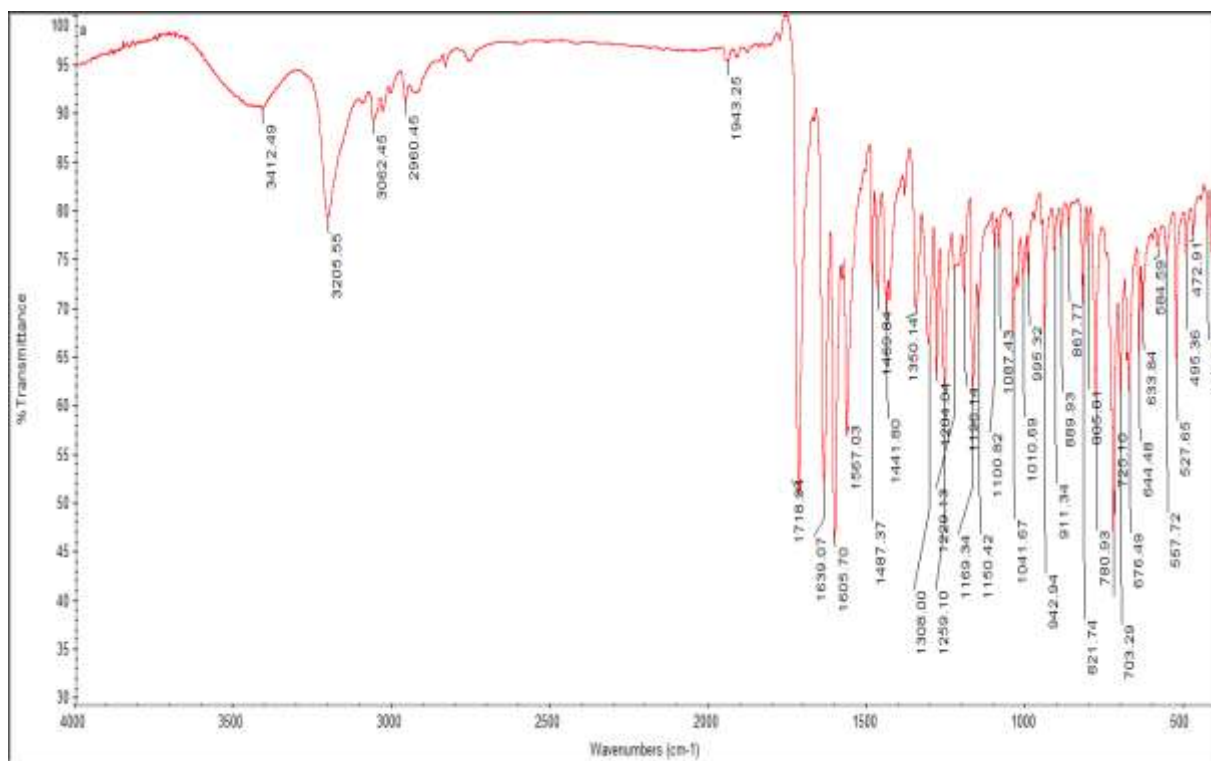

Fig.S5. FT-IR spectra of compound 5a

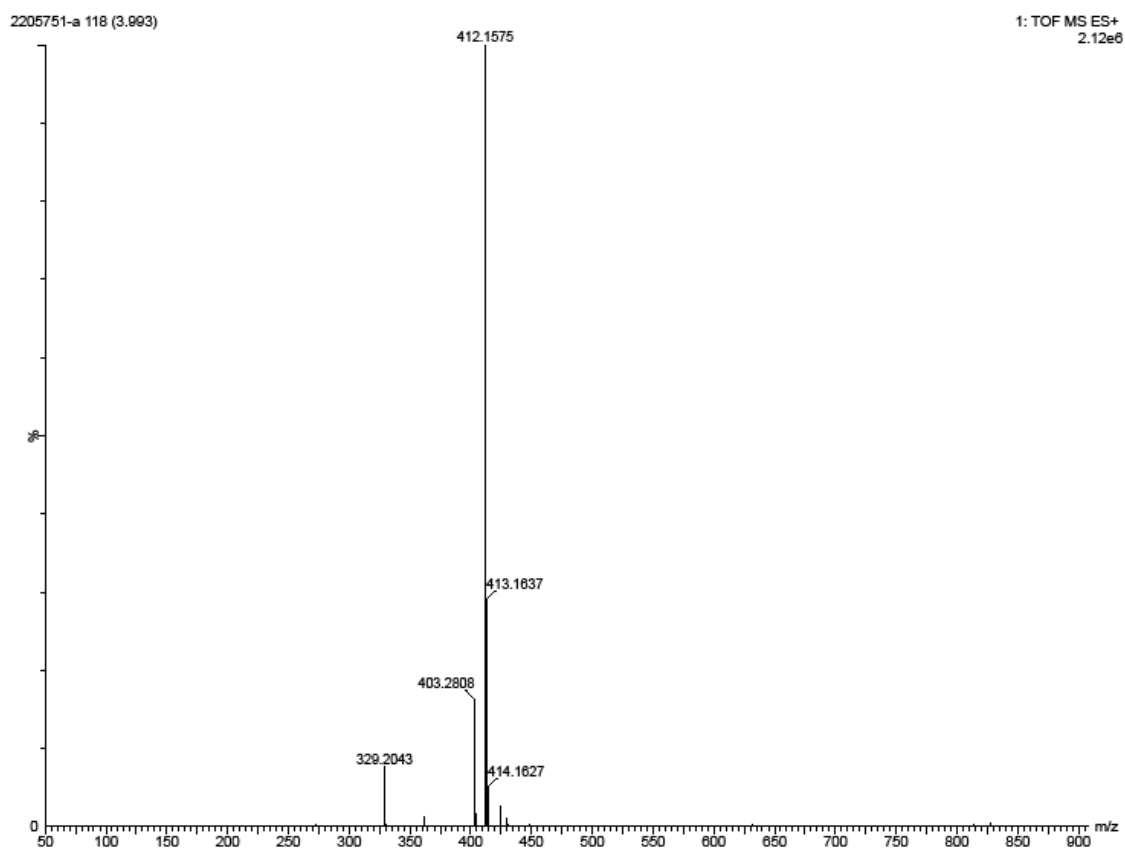

Fig.S6. Mass spectra of compound 5a

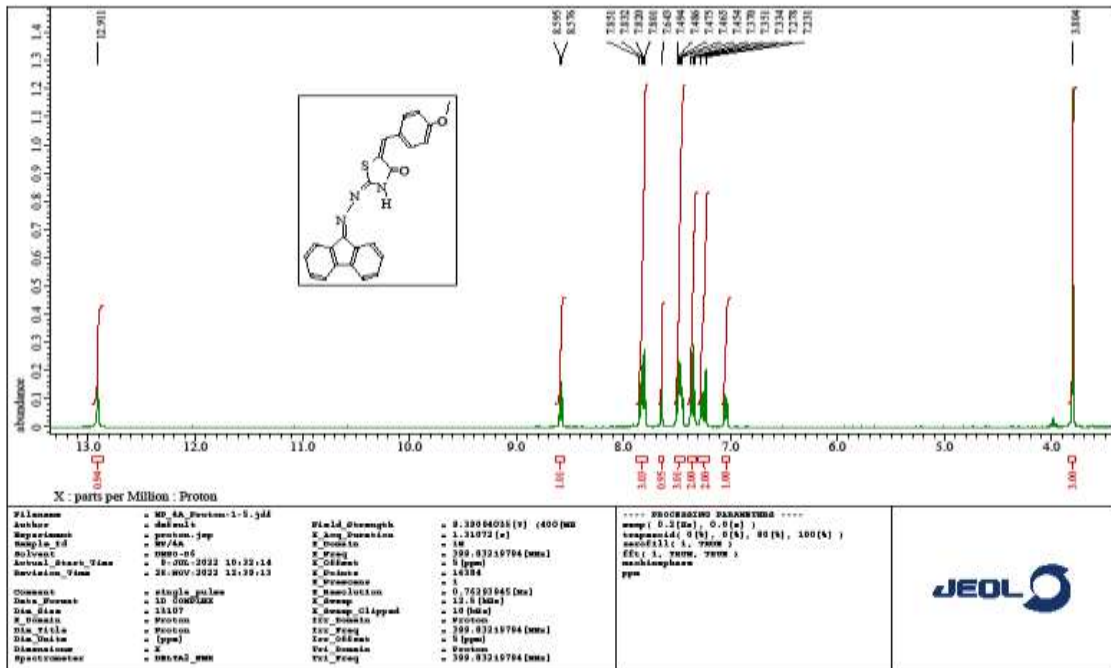

You created this PDF from an application that is not licensed to print to novaPDF printer (<http://www.novapdf.com>)

Fig.S7.  $^1\text{H}$  spectra of compound 5a

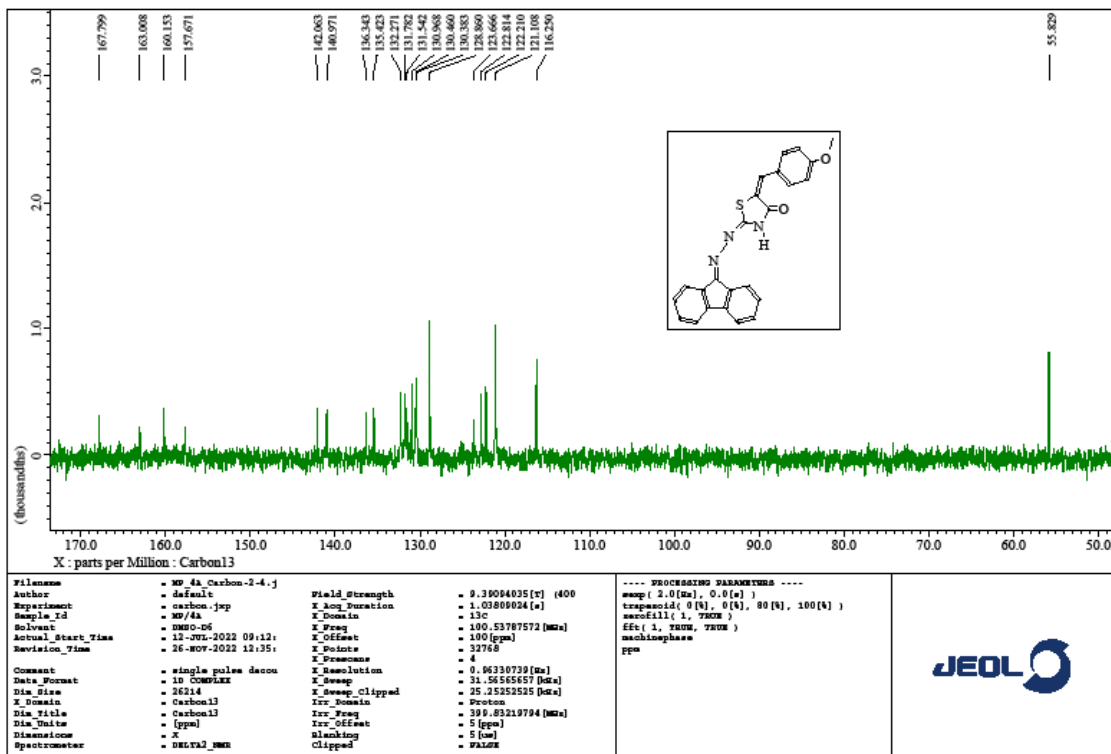

You created this PDF from an application that is not licensed to print to novaPDF printer (<http://www.novapdf.com>)

Fig.S8.  $^{13}\text{C}$  spectra of compound 5a

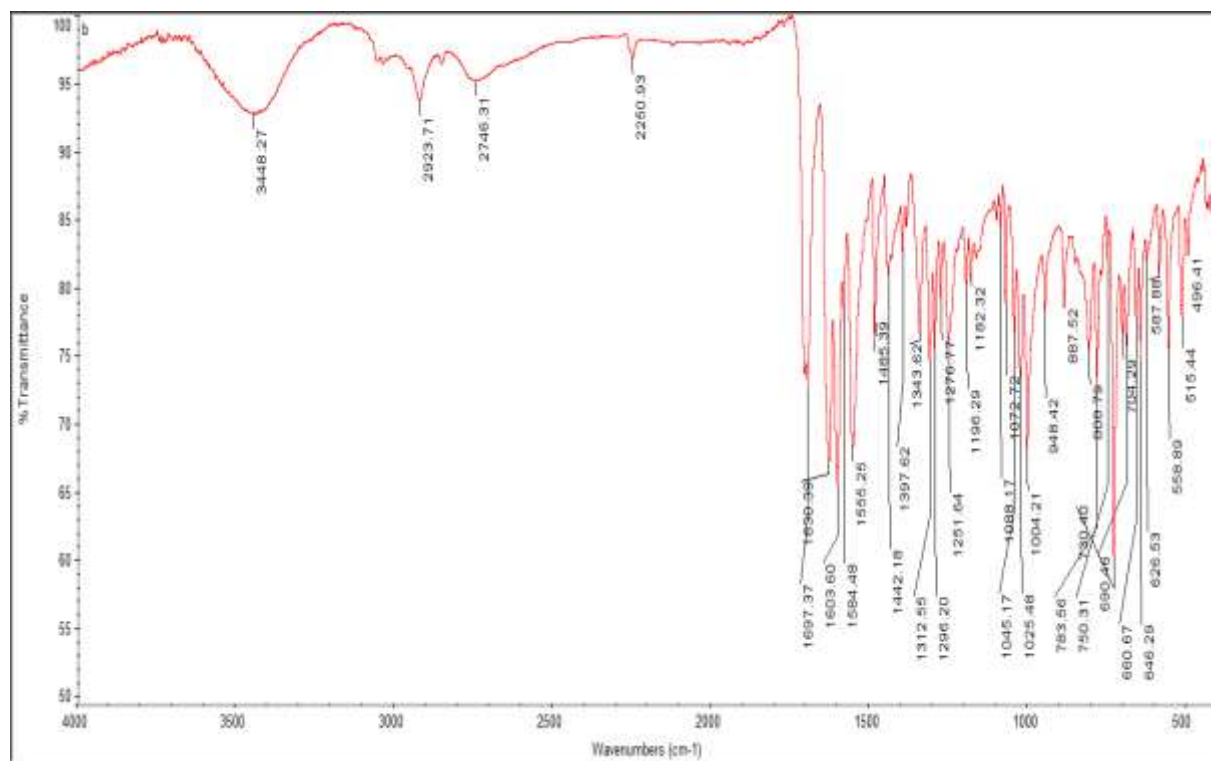

Fig.S9. FT-IR spectra of compound 5b

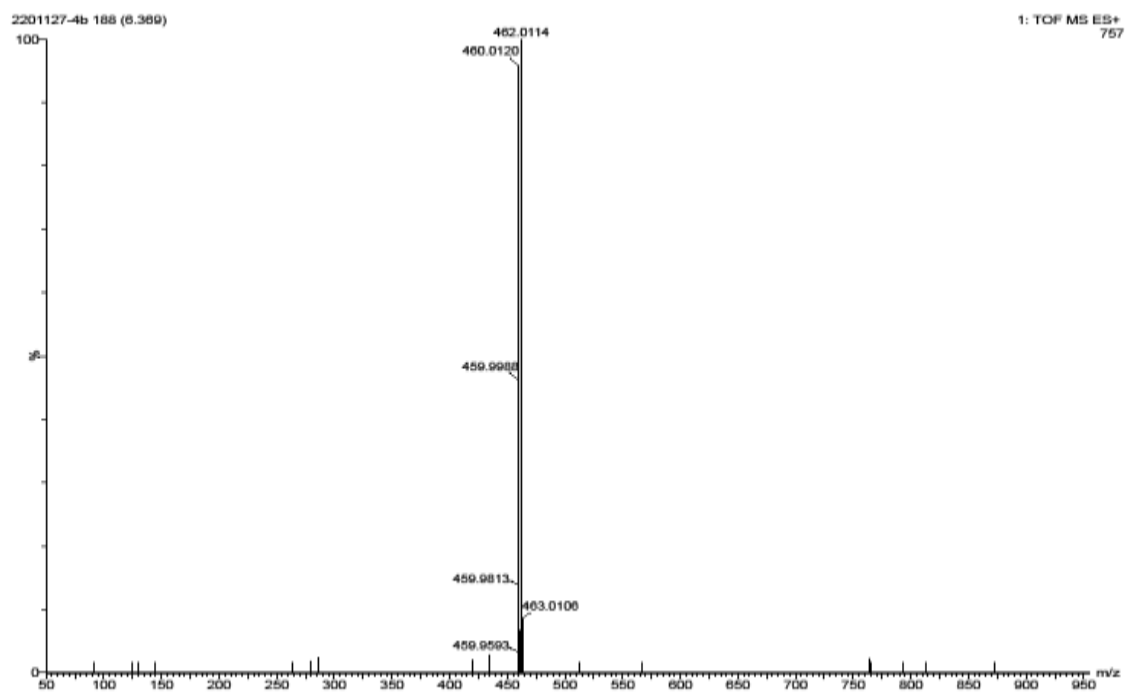

Fig.S10. Mass spectra of compound 5b

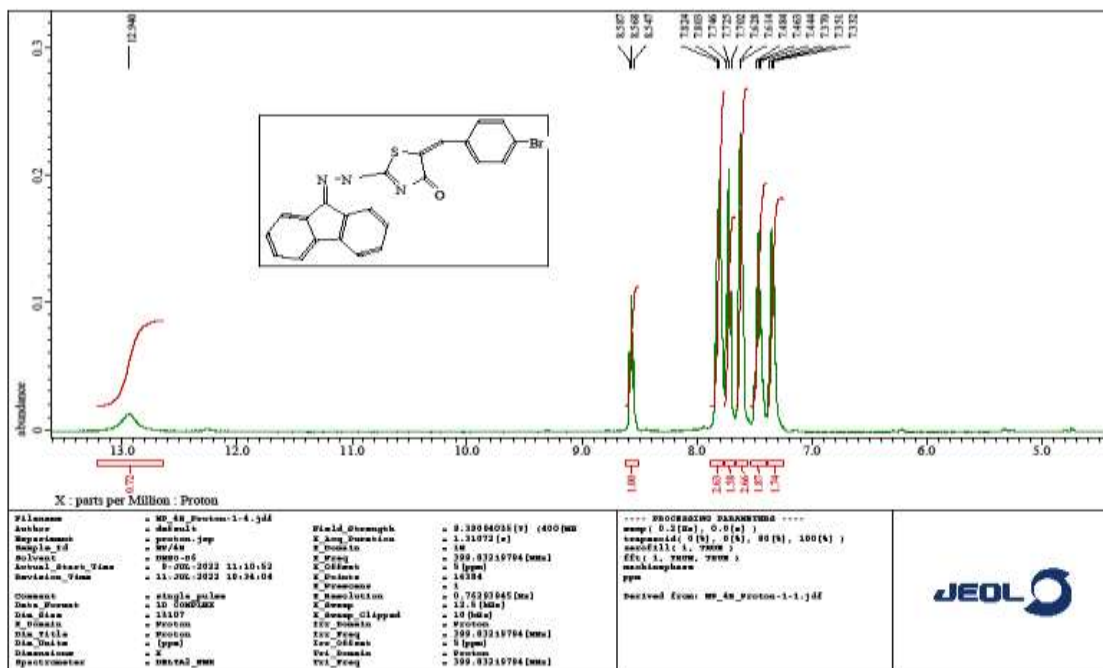

Fig.S11.  $^1\text{H}$  spectra of compound 5b

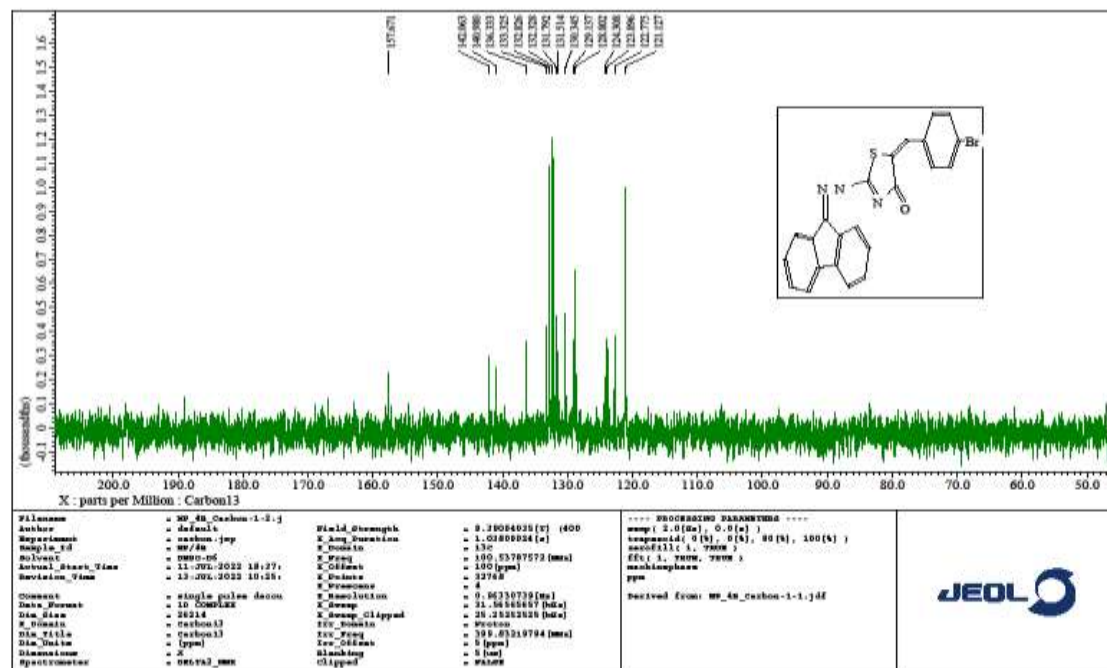

Fig.S12.  $^{13}\text{C}$  spectra of compound 5b

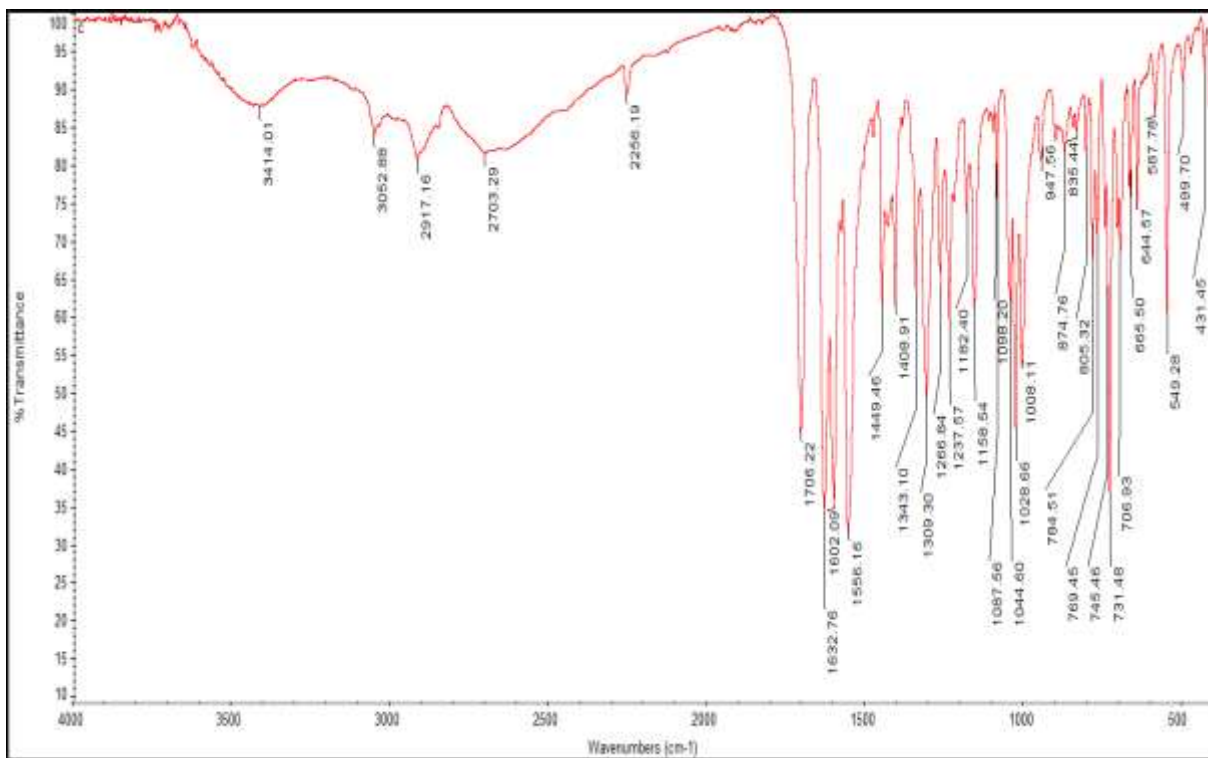

Fig.S13. FT-IR spectra of compound 5c

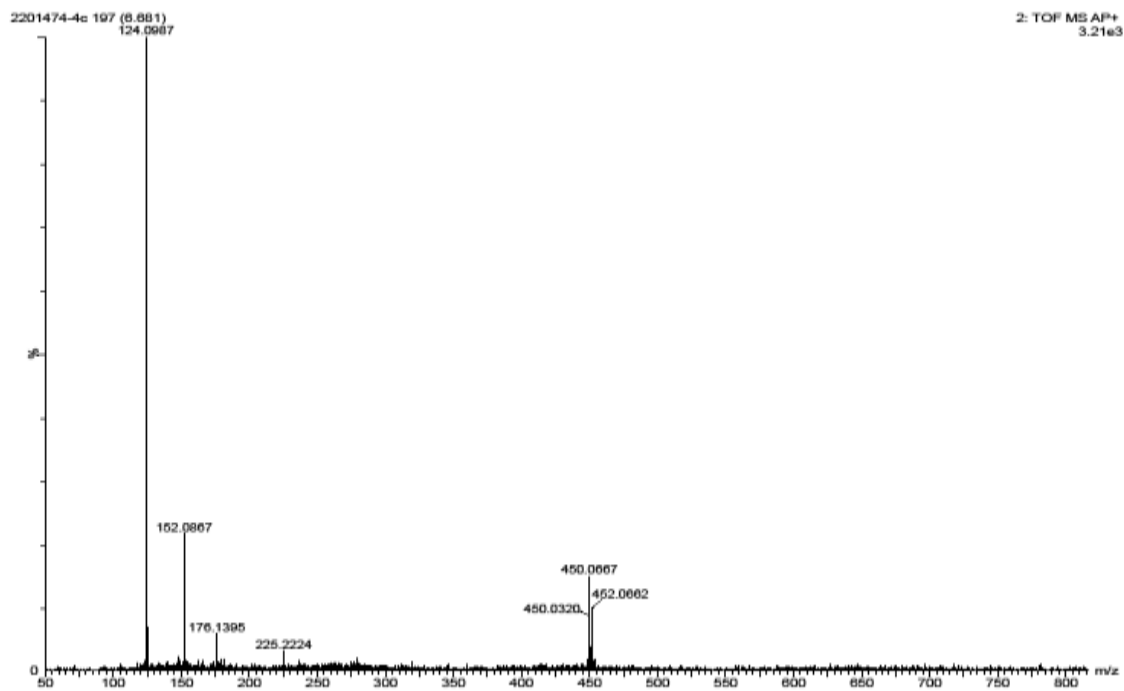

Fig.S14. Mass spectra of compound 5c

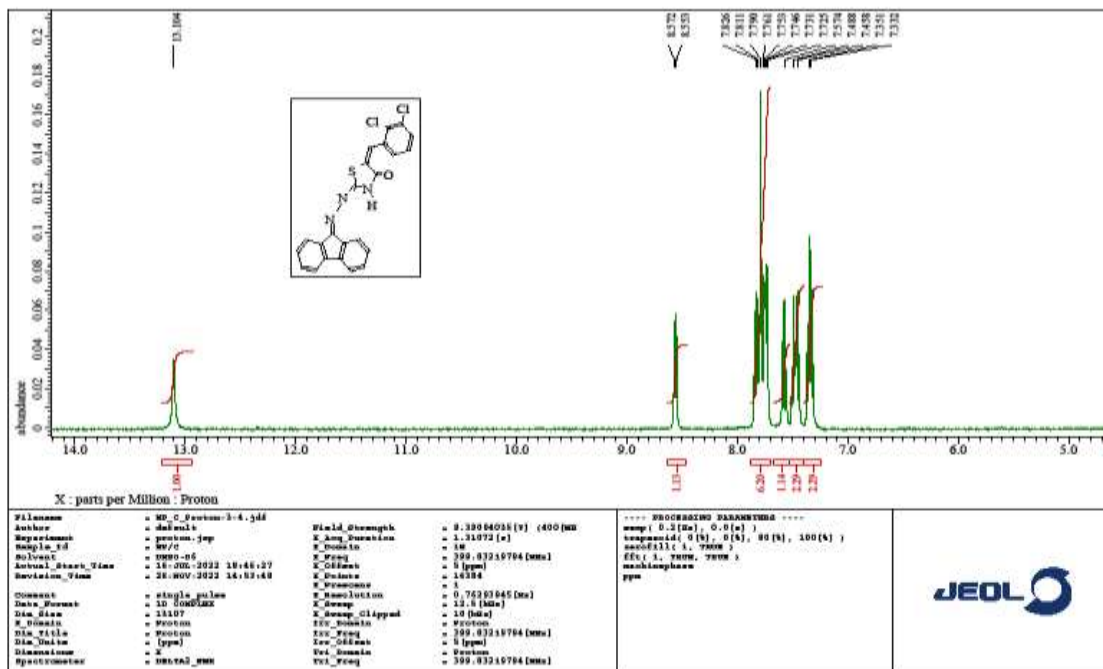

You created this PDF from an application that is not licensed to print to novaPDF printer (<http://www.novapdf.com>)

Fig.S15. <sup>1</sup>H spectra of compound 5C

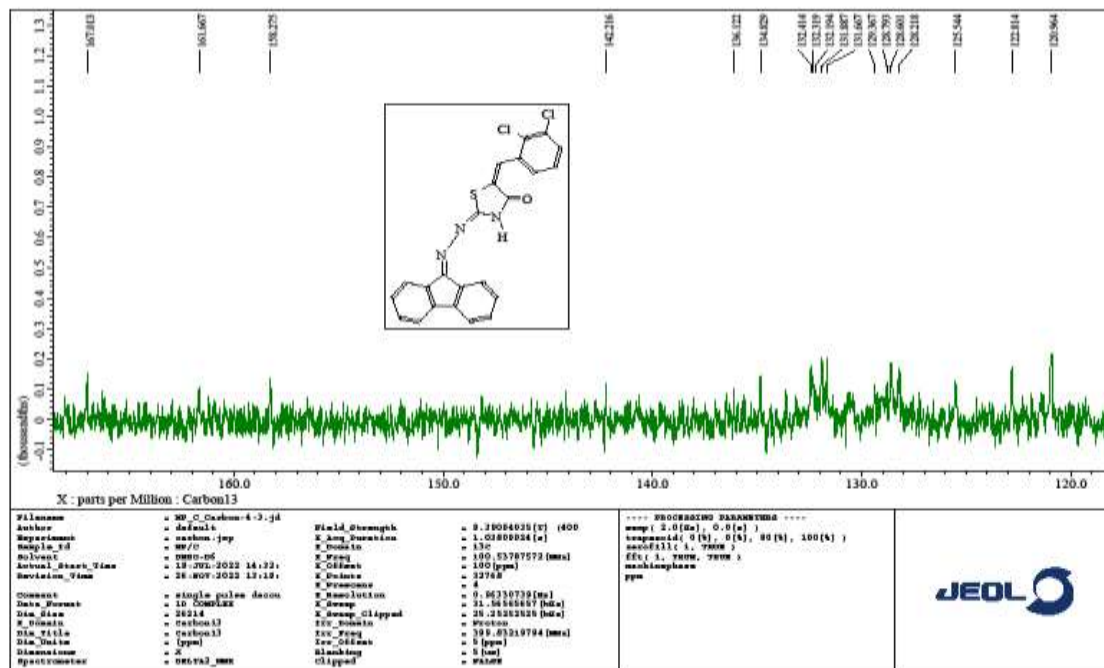

You created this PDF from an application that is not licensed to print to novaPDF printer (<http://www.novapdf.com>)

Fig.S16. <sup>13</sup>C spectra of compound 5C



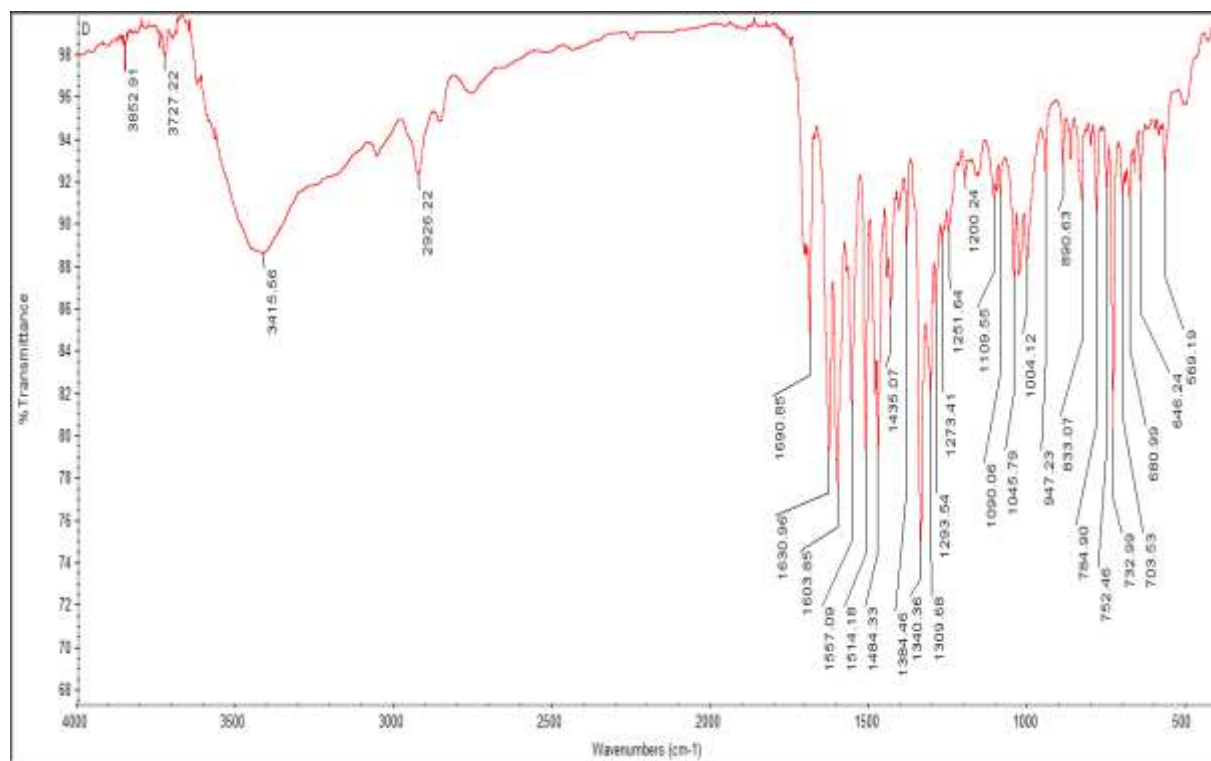

Fig.S17. FT-IR spectra of compound 5d

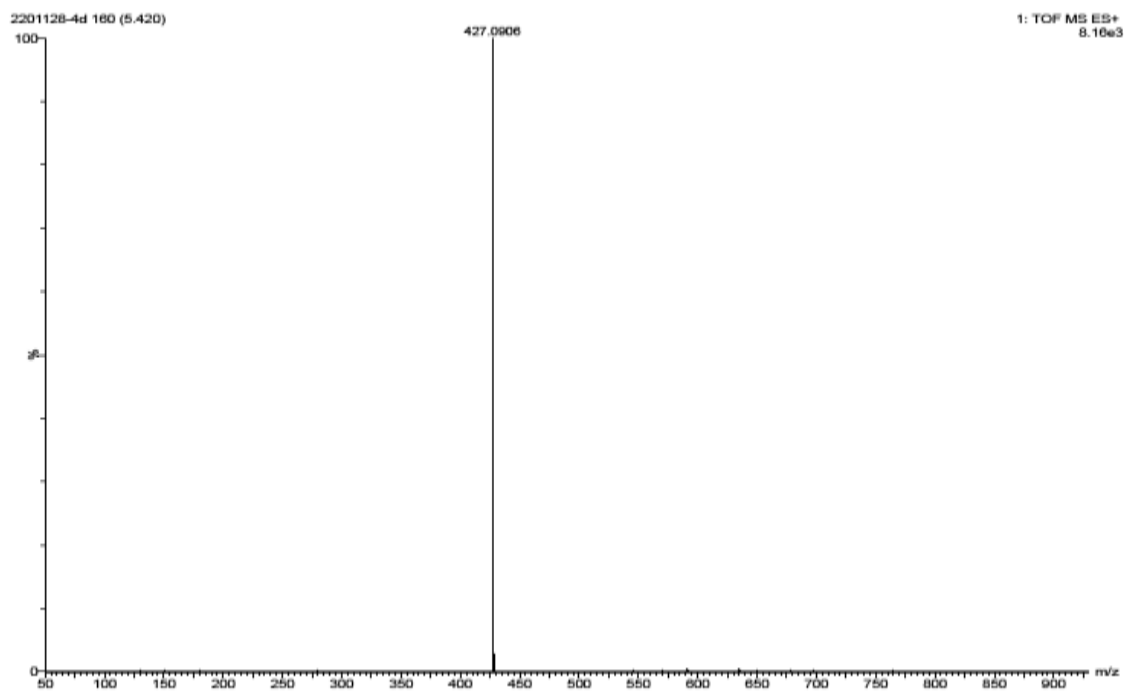

Fig.S18. Mass spectra of compound 5d

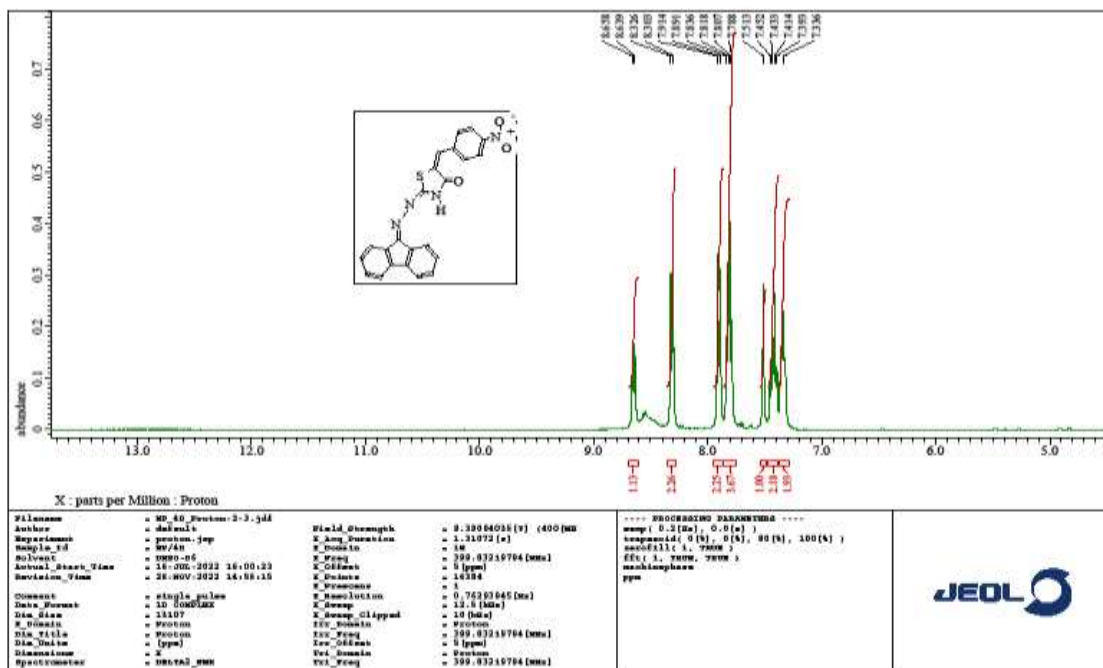

You created this PDF from an application that is not licensed to print to novaPDF printer (<http://www.novapdf.com>)

Fig.S19. <sup>1</sup>H spectra of compound 5d

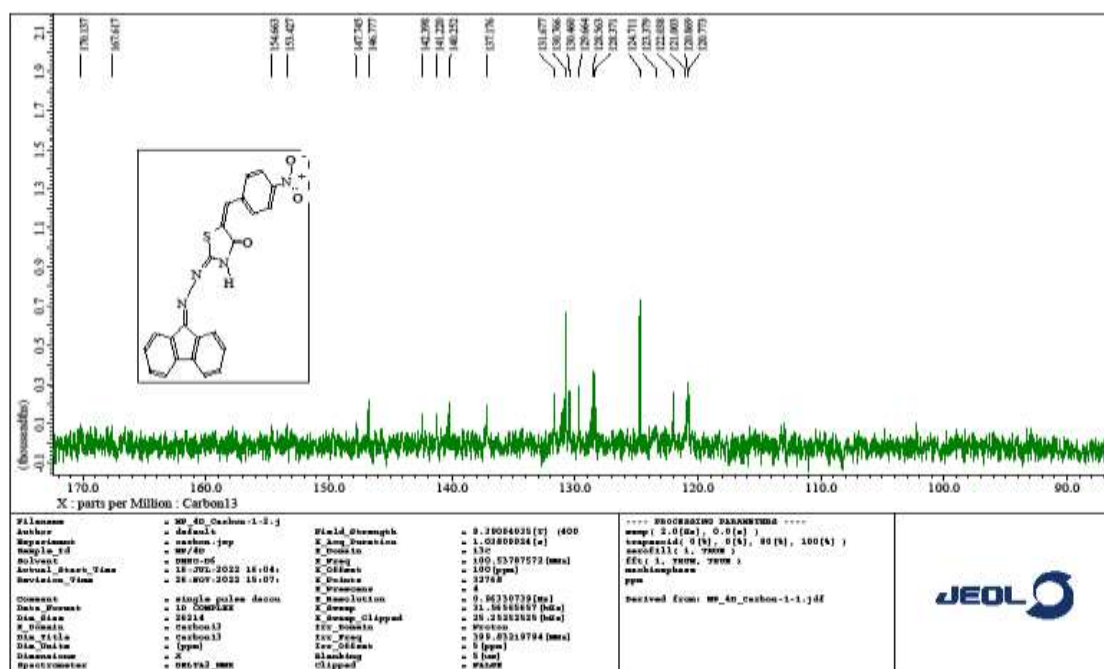

You created this PDF from an application that is not licensed to print to novaPDF printer (<http://www.novapdf.com>)

Fig.S20. <sup>13</sup>C spectra of compound 5d

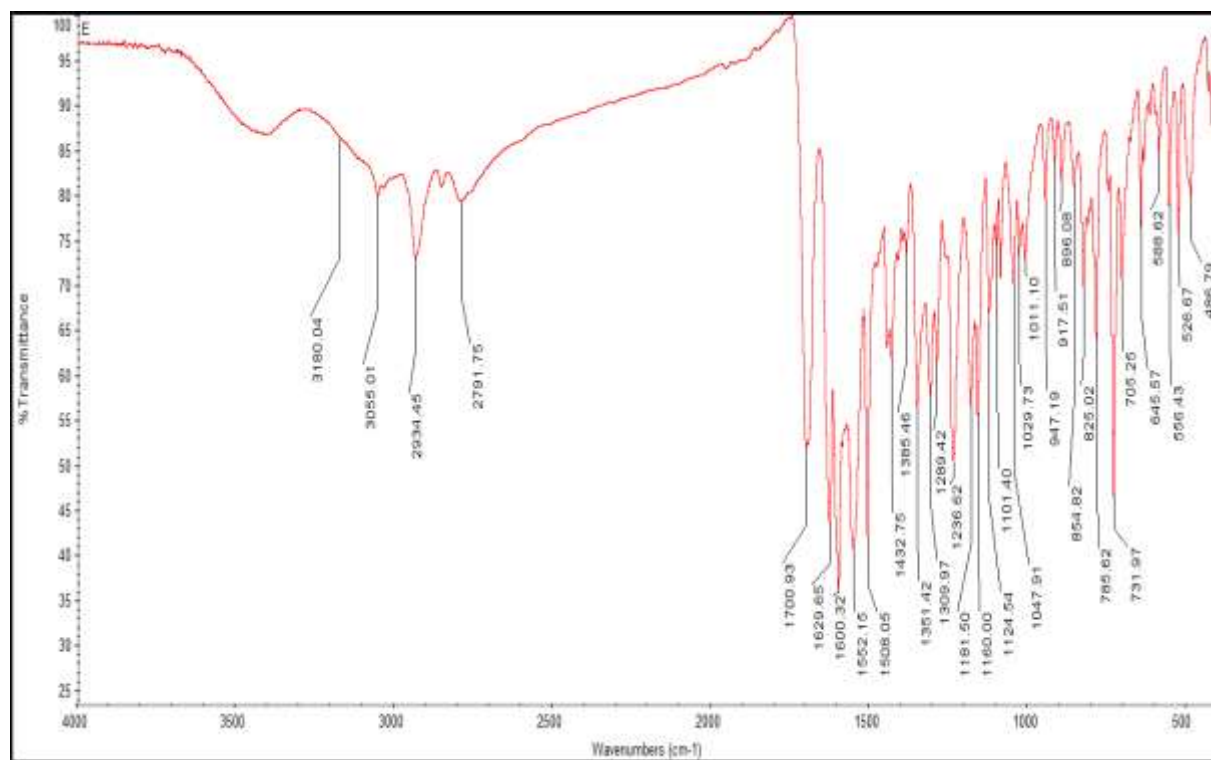

Fig.S21. FT-IR spectra of compound 5e

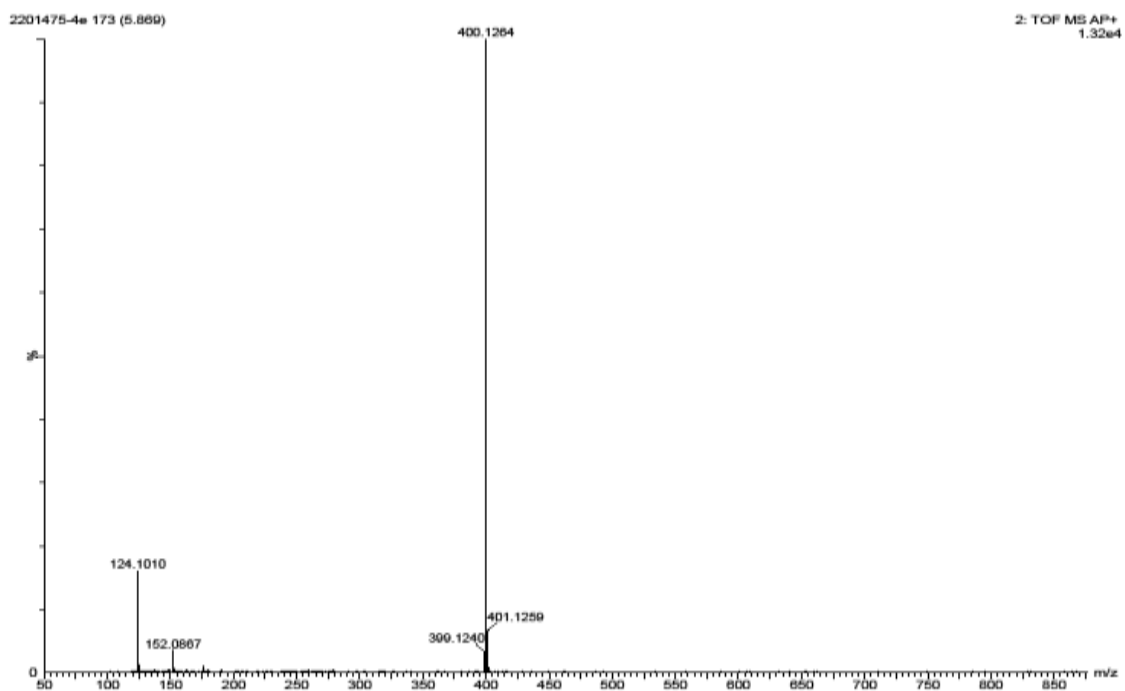

Fig.S22. Mass spectra of compound 5e

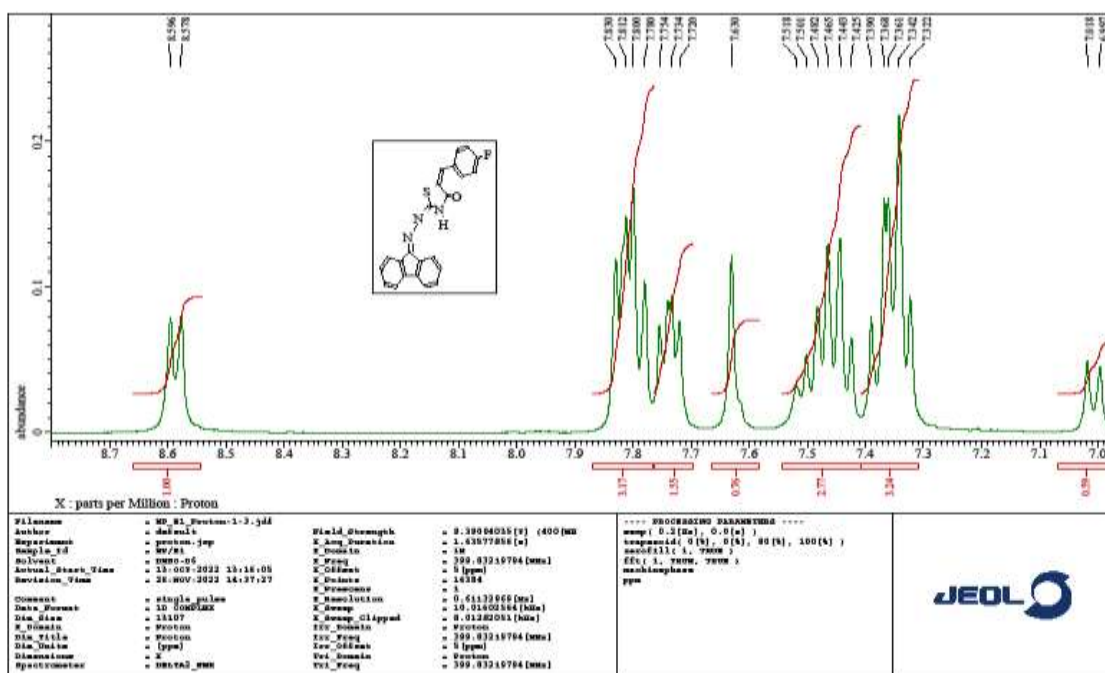

You created this PDF from an application that is not licensed to print to novaPDF printer (<http://www.novapdf.com>)

Fig.S23. <sup>1</sup>H spectra of compound 5e

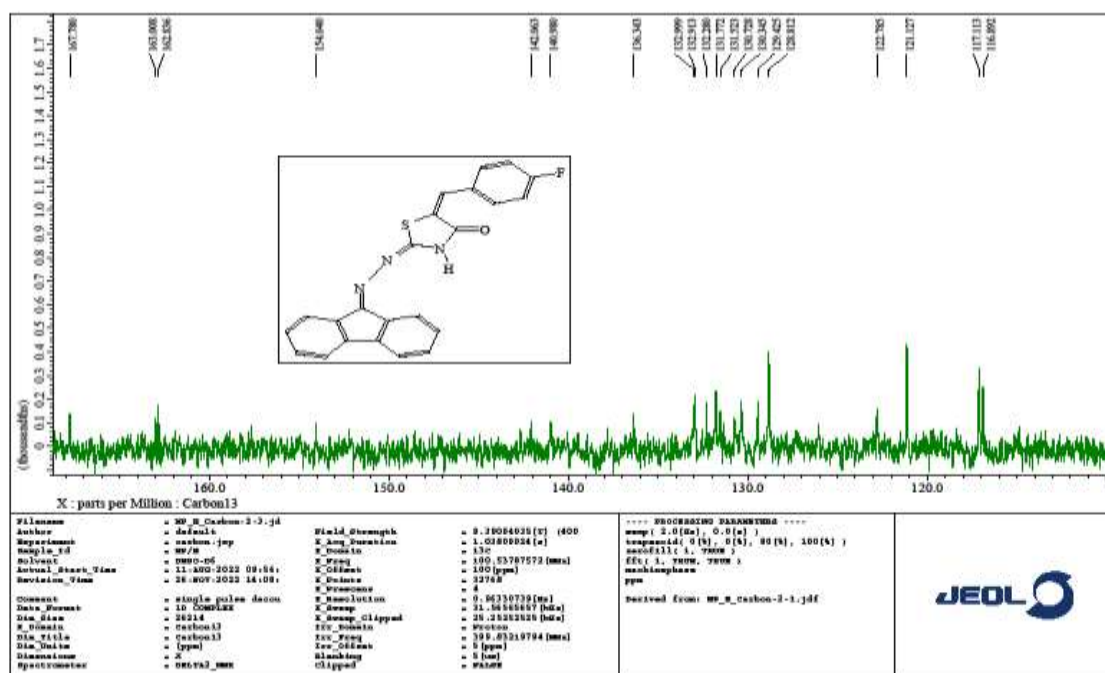

You created this PDF from an application that is not licensed to print to novaPDF printer (<http://www.novapdf.com>)

Fig.S24. <sup>13</sup>C spectra of compound 5e

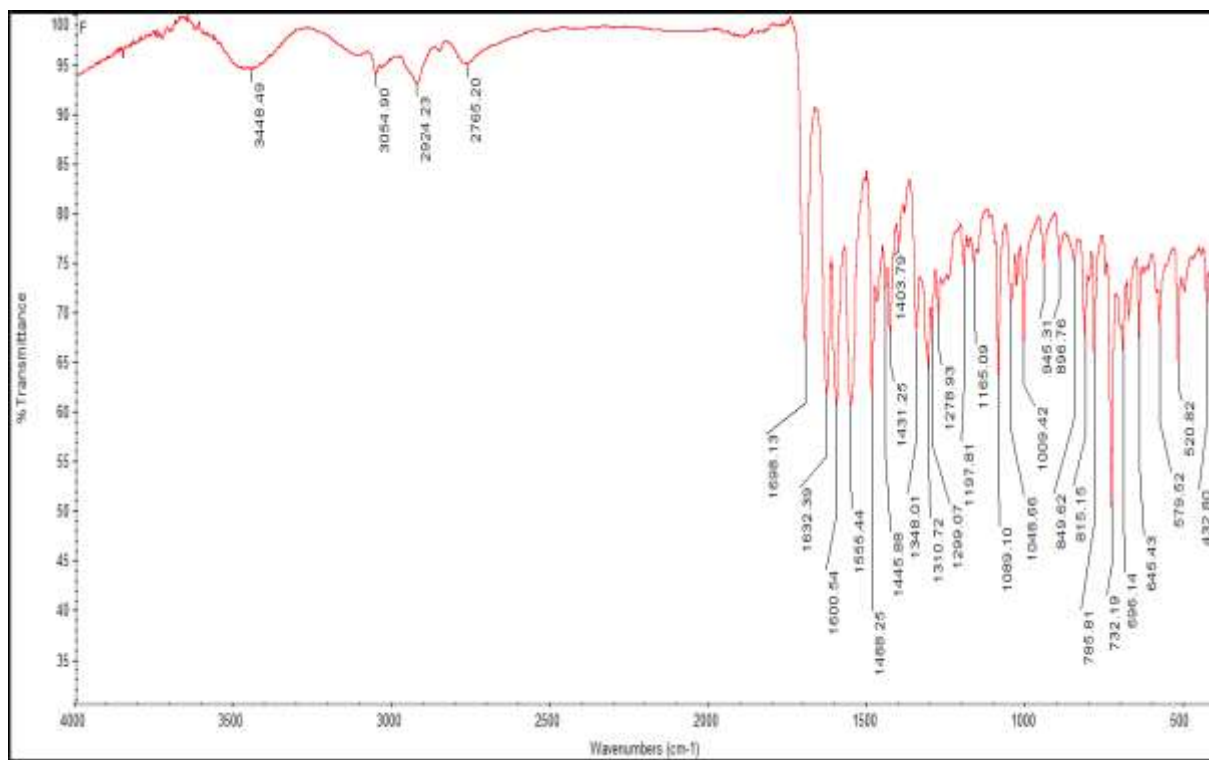

Fig.S25. FT-IR spectra of compound 5f

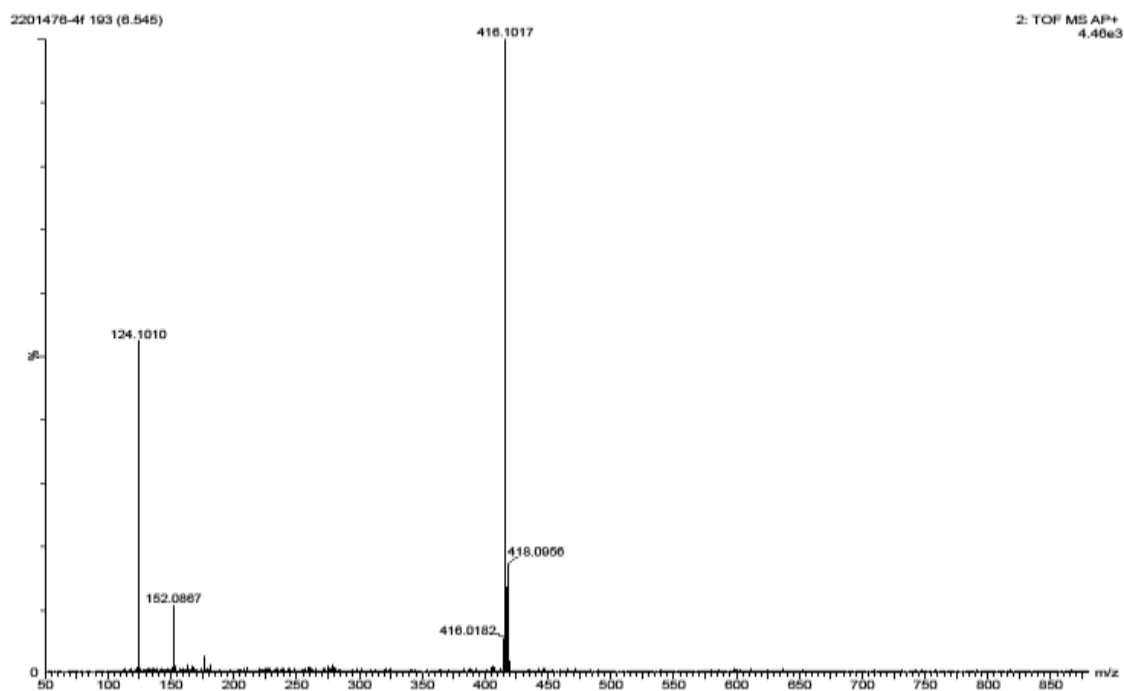

Fig.S26. Mass spectra of compound 5f

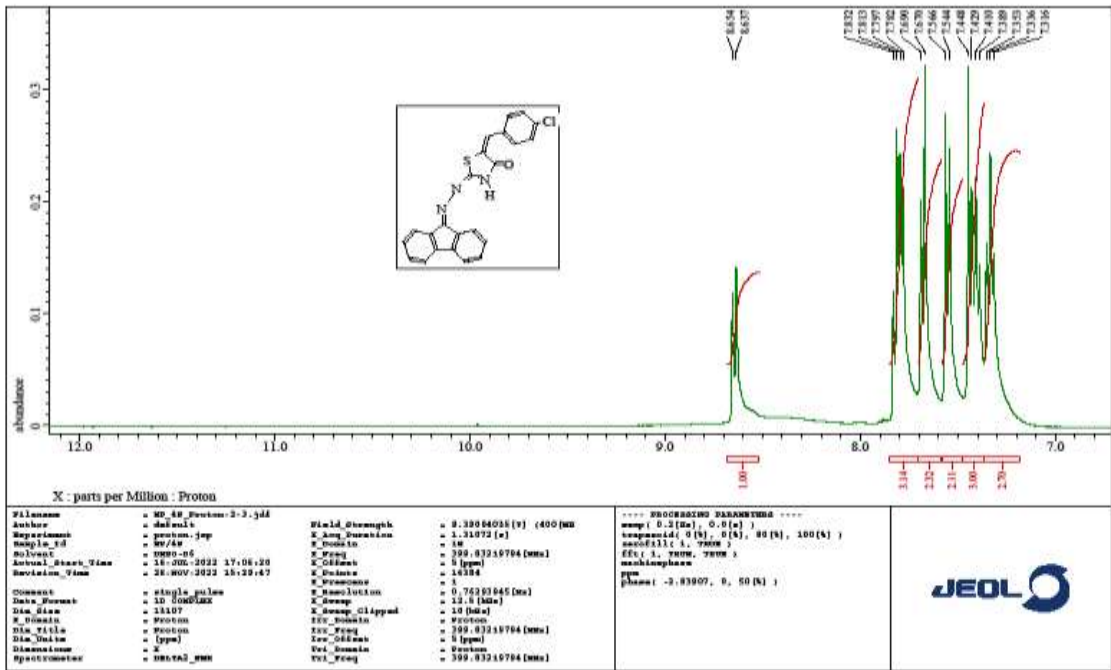

You created this PDF from an application that is not licensed to print to novaPDF printer (<http://www.novapdf.com>)

Fig.S27: <sup>1</sup>H spectra of compound 5f

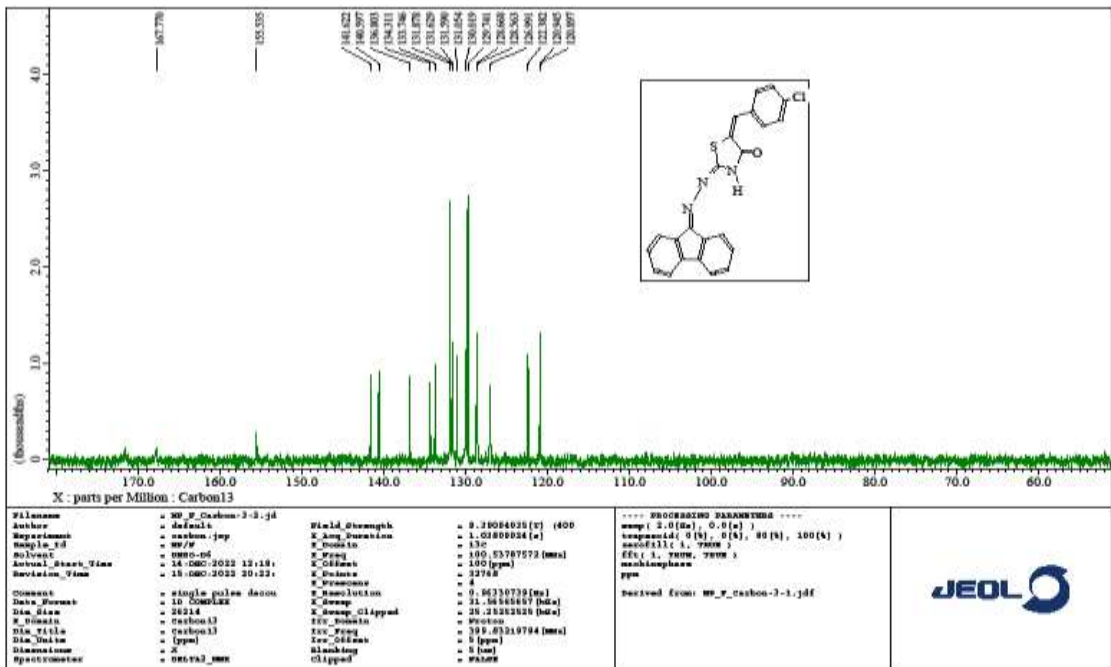

You created this PDF from an application that is not licensed to print to novaPDF printer (<http://www.novapdf.com>)

Fig.S28: <sup>13</sup>C spectra of compound 5f

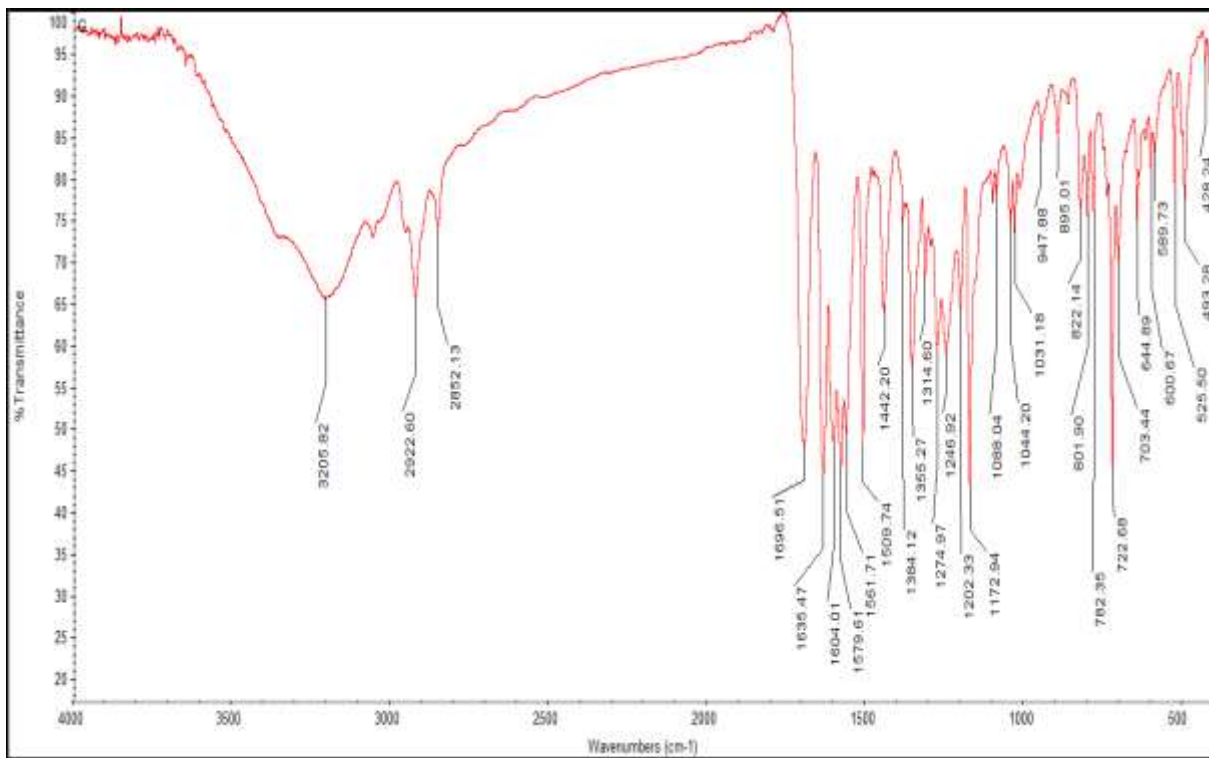

Fig.S29. FT-IR spectra of compound 5g

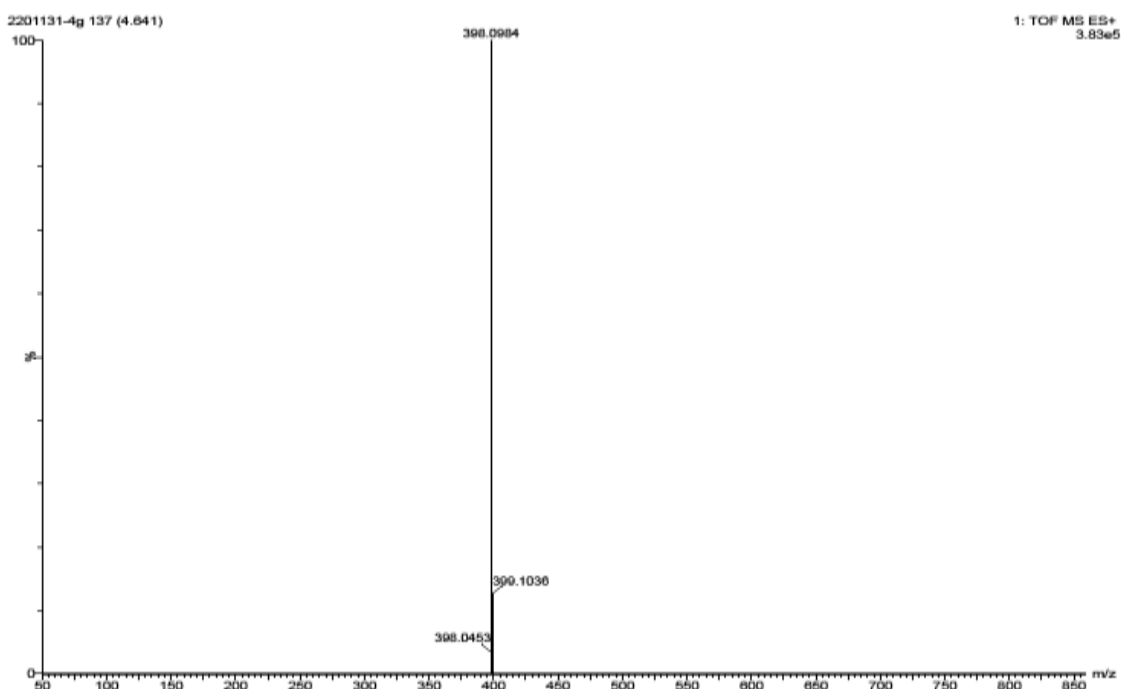

Fig.S30. Mass spectra of compound 5g

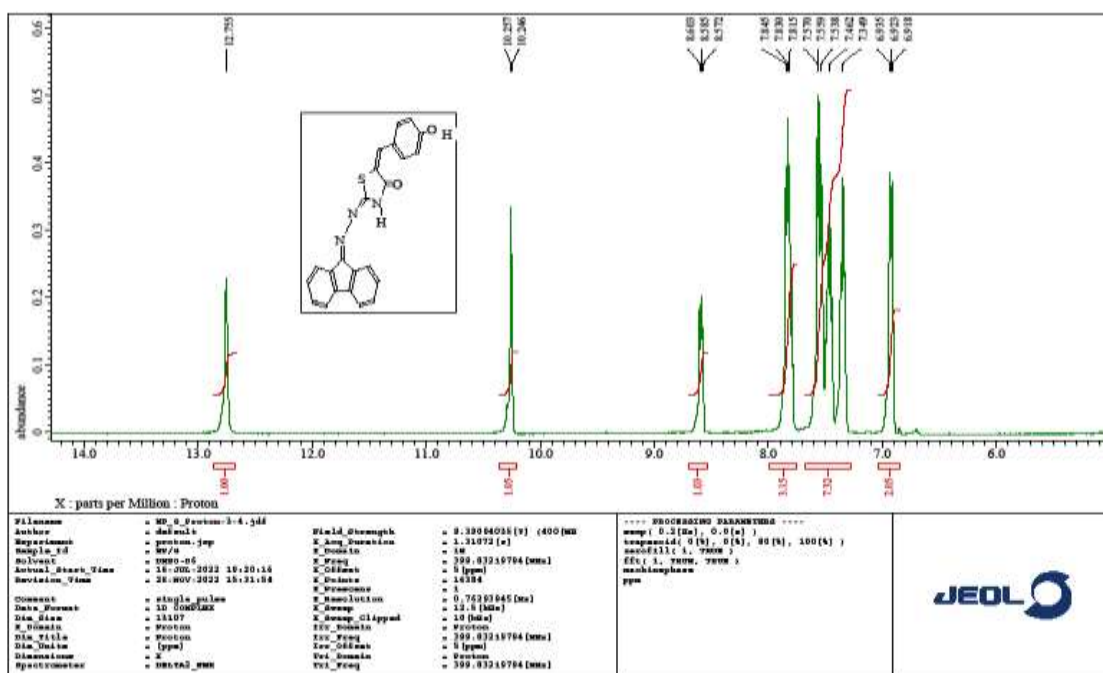

You created this PDF from an application that is not licensed to print to novaPDF printer (<http://www.novapdf.com>)

Fig.S31.  $^1\text{H}$  spectra of compound 5g

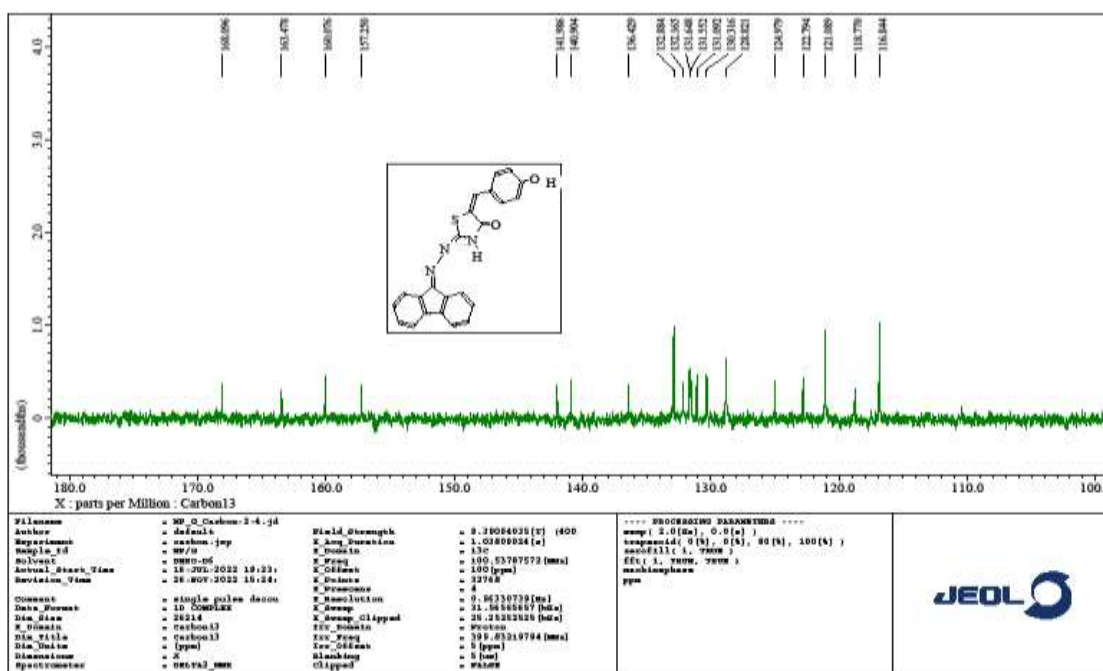

You created this PDF from an application that is not licensed to print to novaPDF printer (<http://www.novapdf.com>)

Fig.S32.  $^{13}\text{C}$  spectra of compound 5g



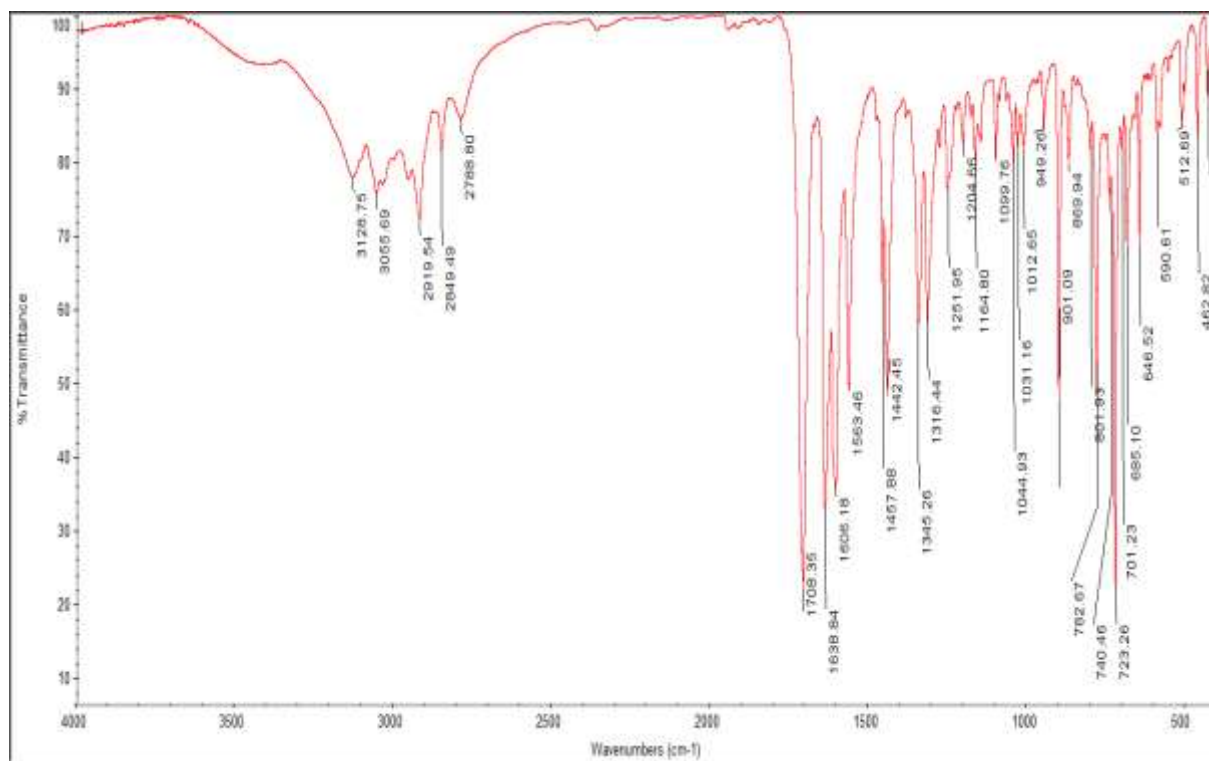

Fig.S33. FT-IR spectra of compound 5i

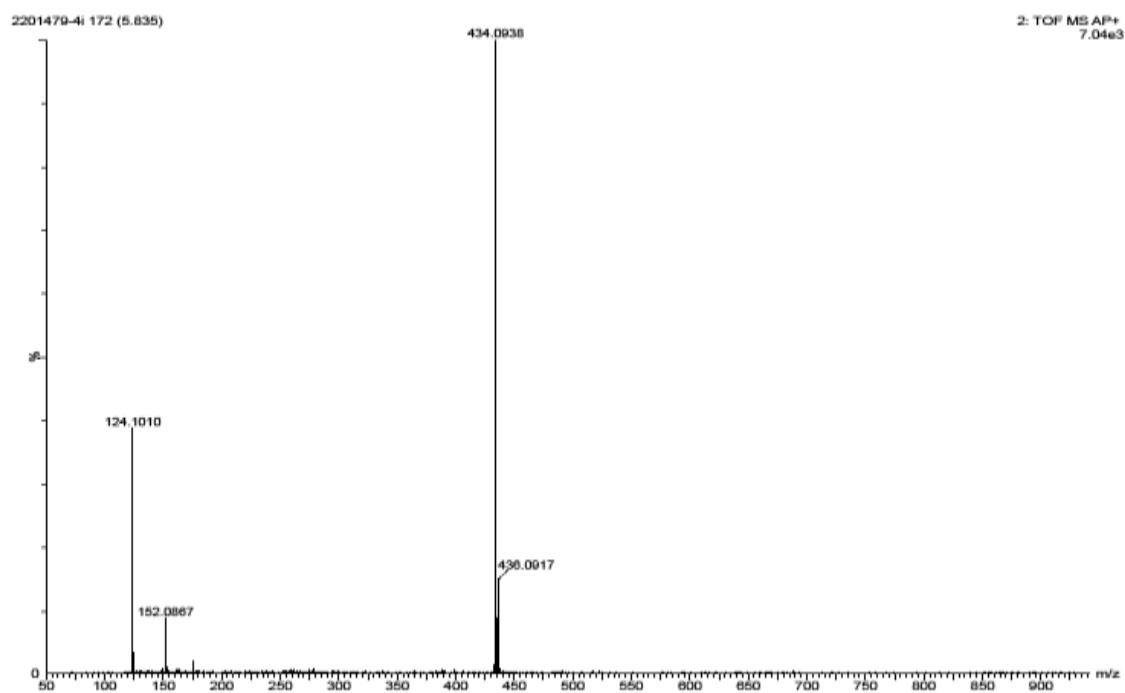

Fig.S34. Mass spectra of compound 5i

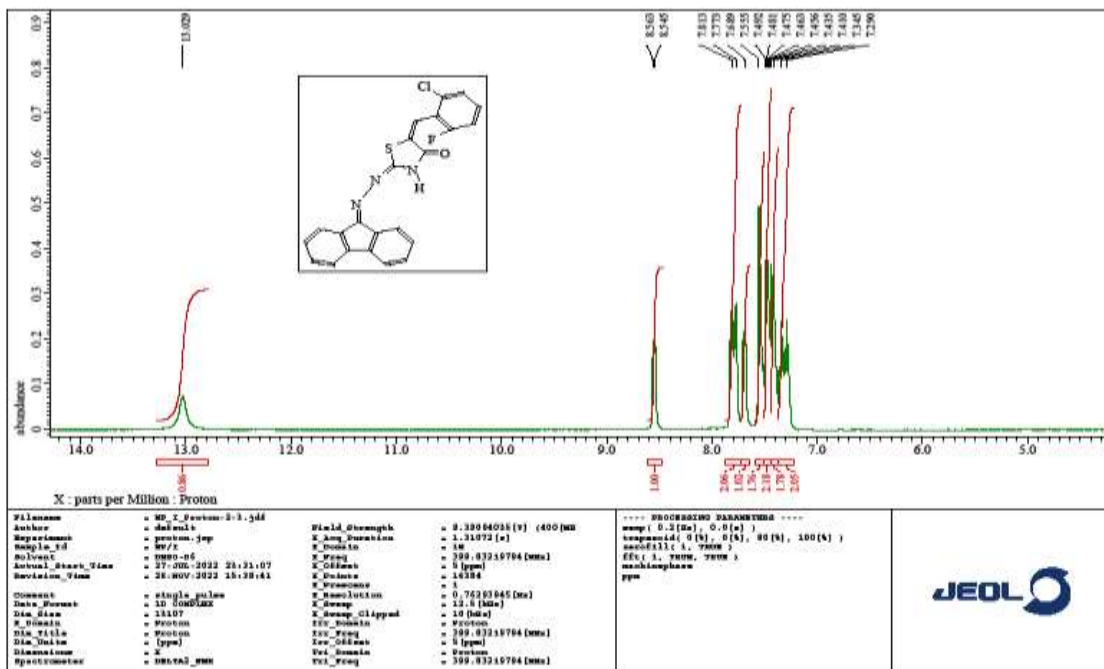

You created this PDF from an application that is not licensed to print to novaPDF printer (<http://www.novapdf.com>)

Fig.S35.  $^1\text{H}$  spectra of compound 5i

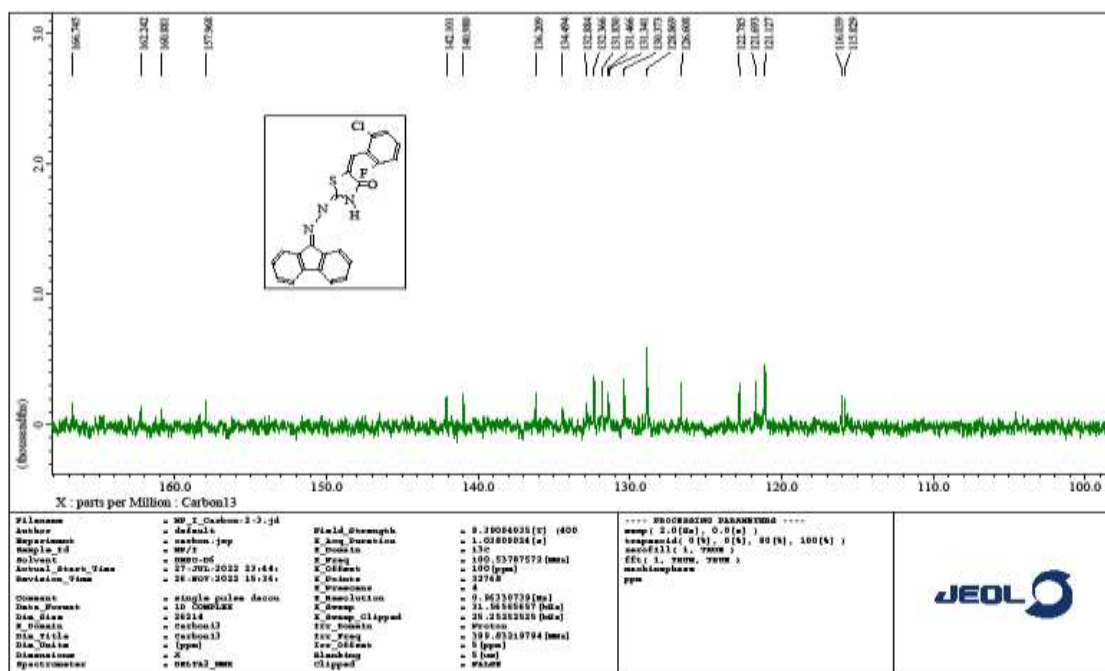

You created this PDF from an application that is not licensed to print to novaPDF printer (<http://www.novapdf.com>)

Fig.S36.  $^{13}\text{C}$  spectra of compound 5i

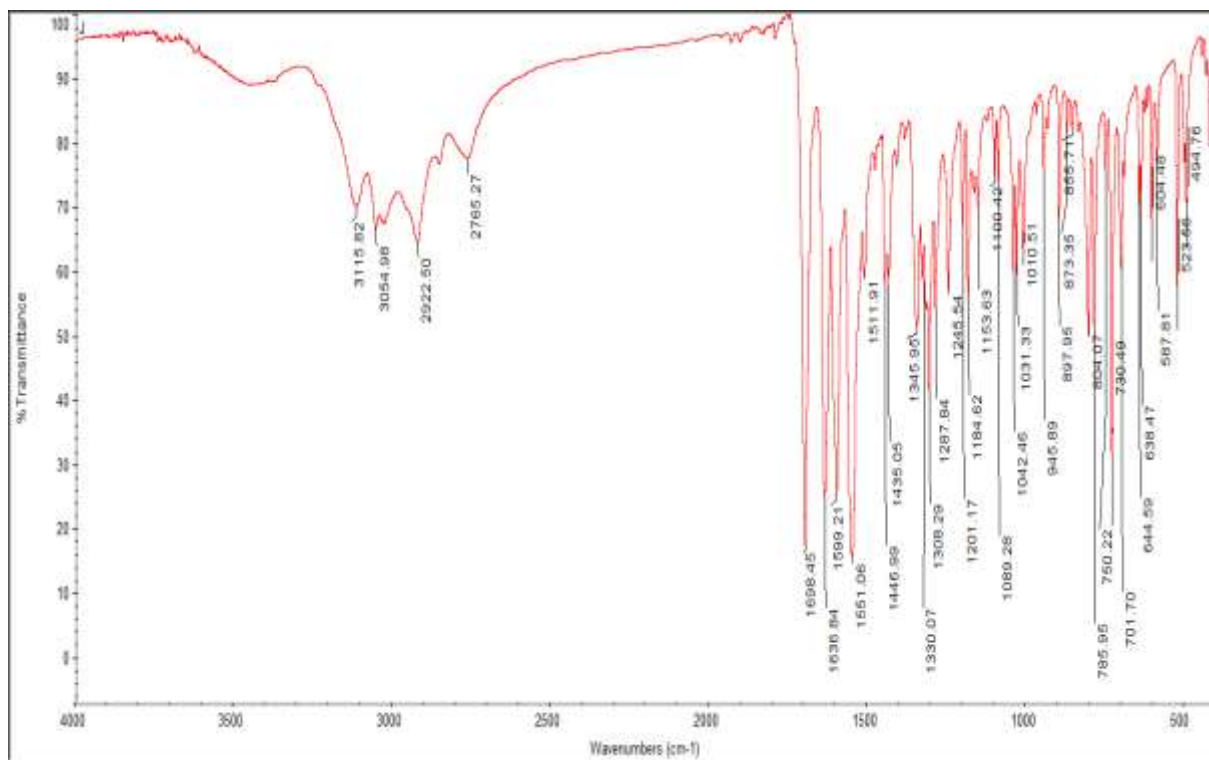

Fig.S37. FT-IR spectra of compound 5j

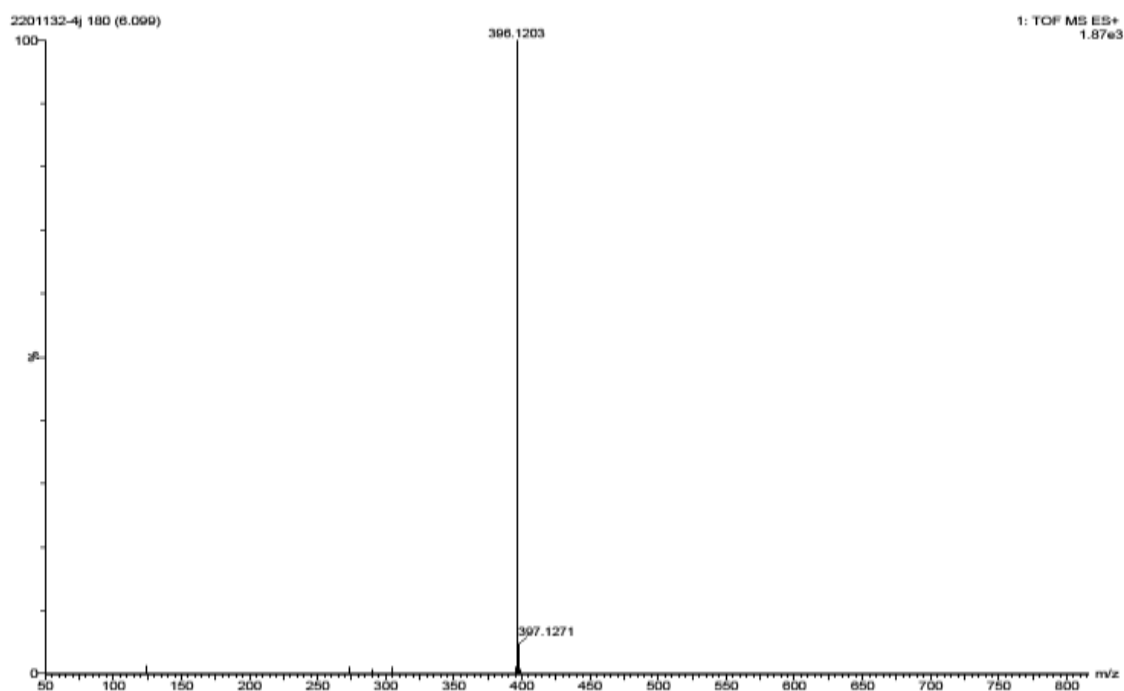

Fig.S38. Mass spectra of compound 5j

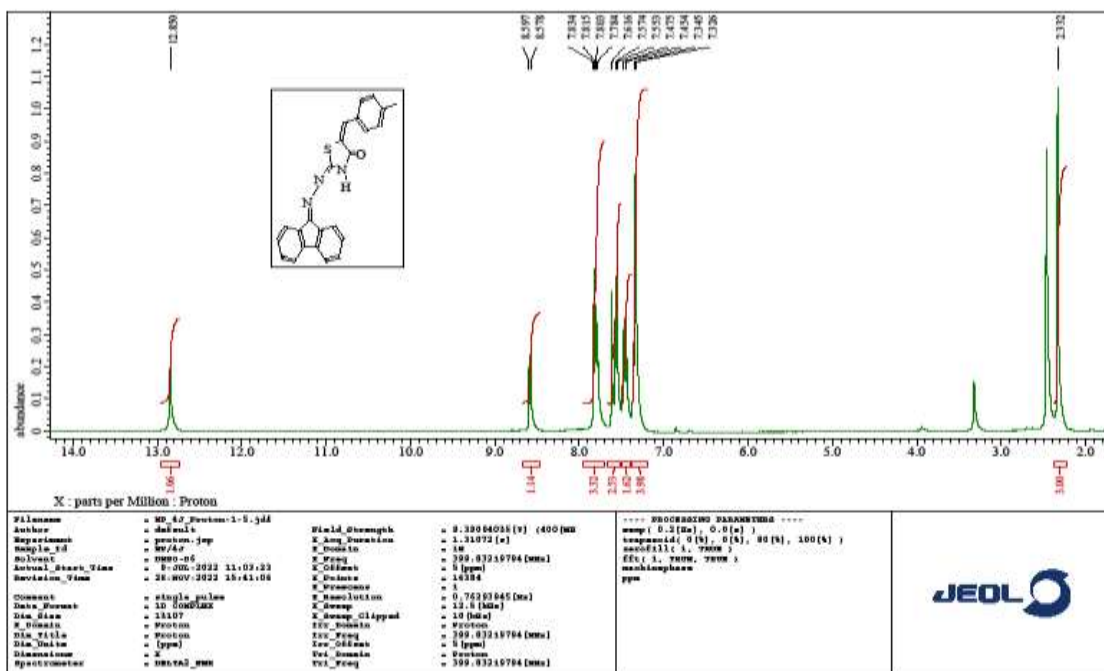

You created this PDF from an application that is not licensed to print to novaPDF printer (<http://www.novapdf.com>)

Fig.S39.  $^1\text{H}$  spectra of compound 5j

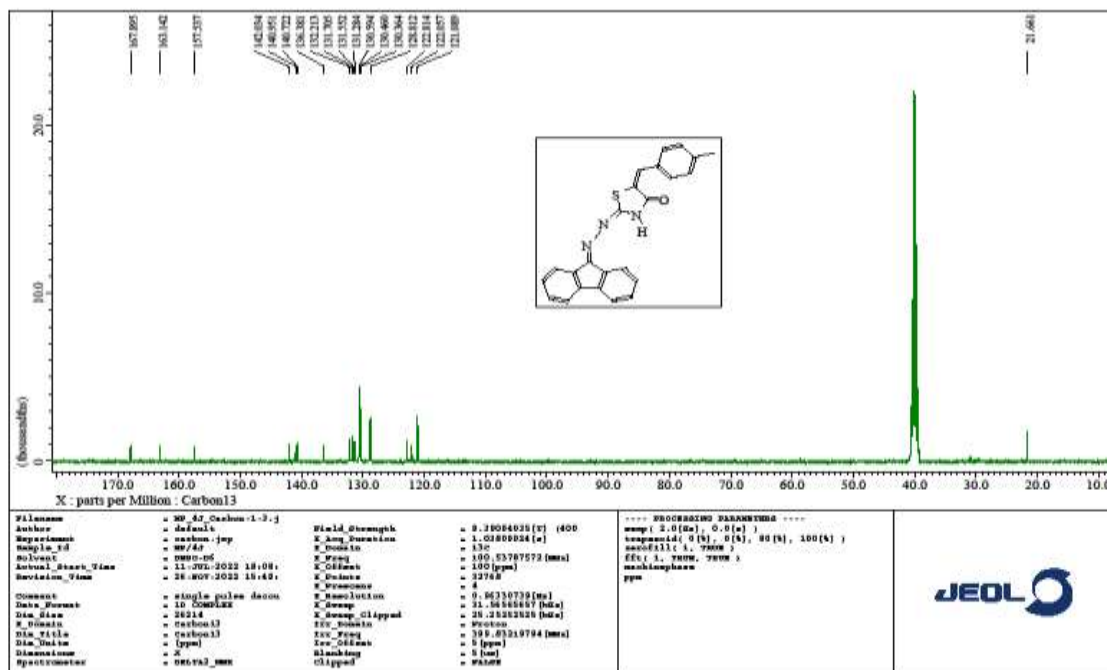

You created this PDF from an application that is not licensed to print to novaPDF printer (<http://www.novapdf.com>)

Fig.S40.  $^{13}\text{C}$  spectra of compound 5j

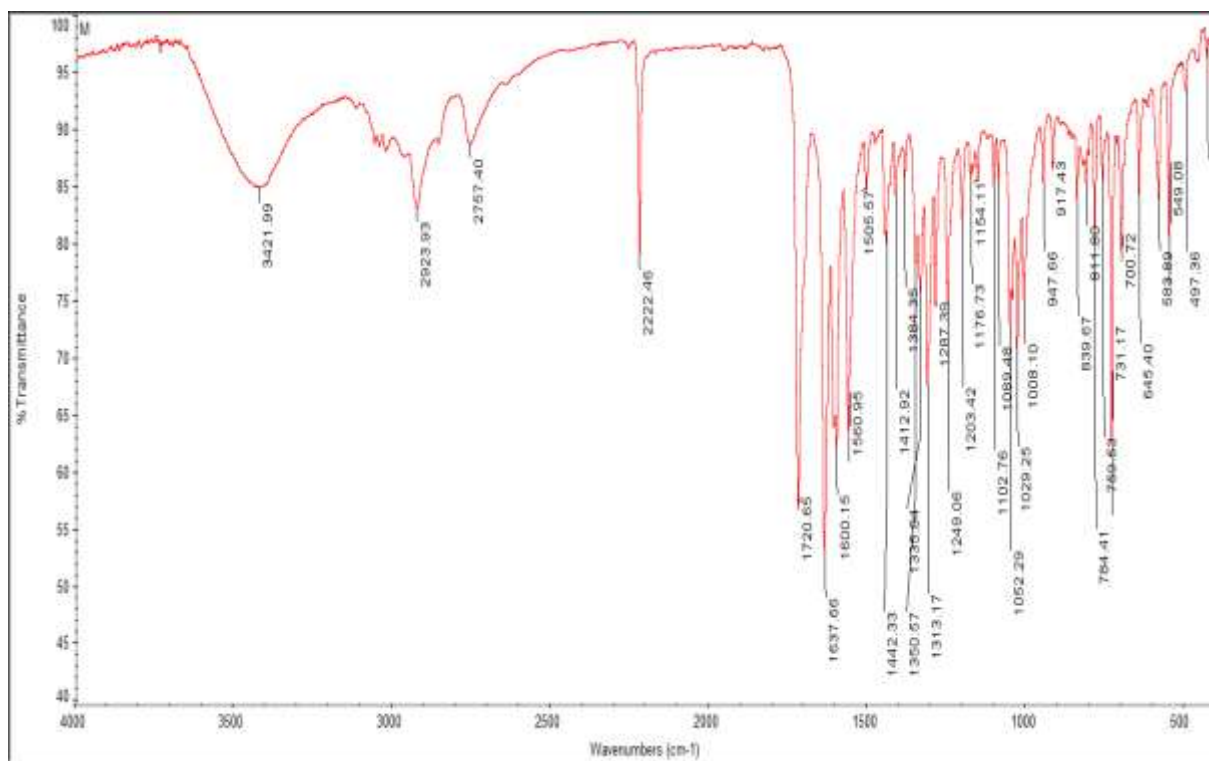

Fig.S41. FT-IR spectra of compound 5k

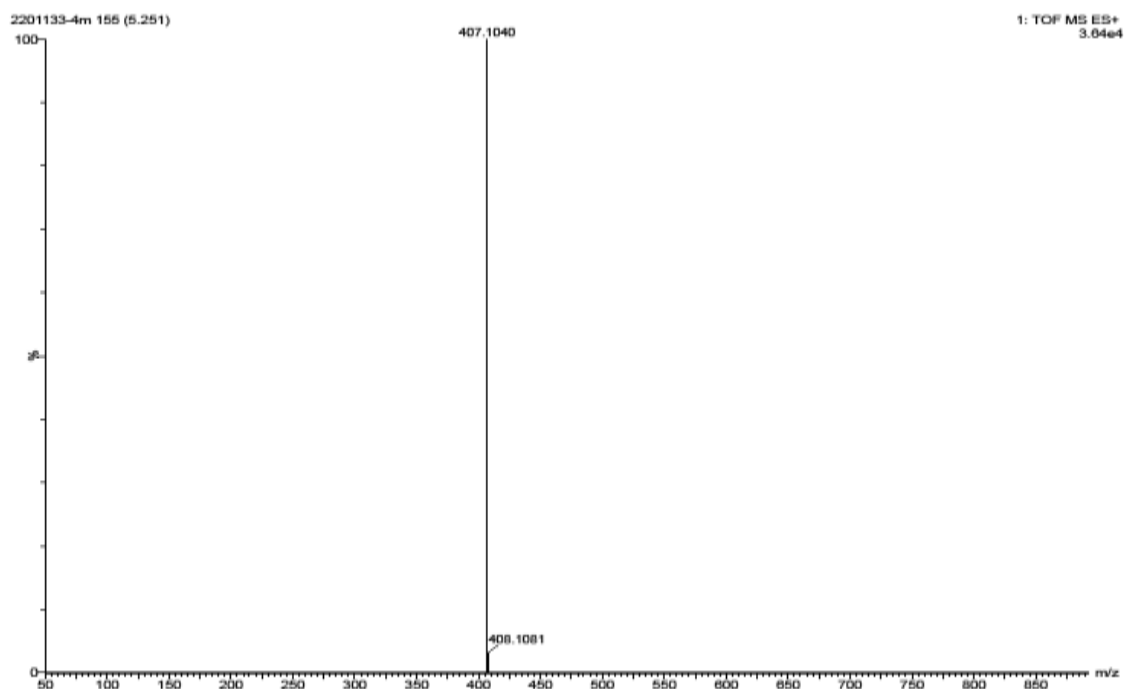

Fig.S42. Mass spectra of compound 5k

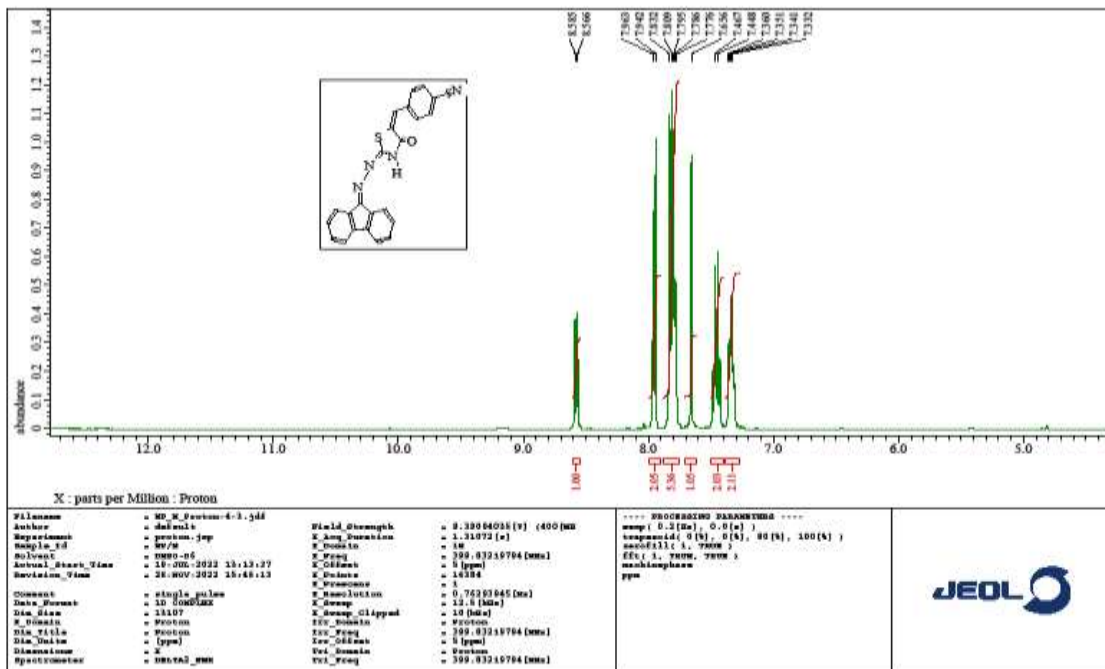

You created this PDF from an application that is not licensed to print to novaPDF printer (<http://www.novapdf.com>)

Fig.S43.  $^1\text{H}$  spectra of compound 5k

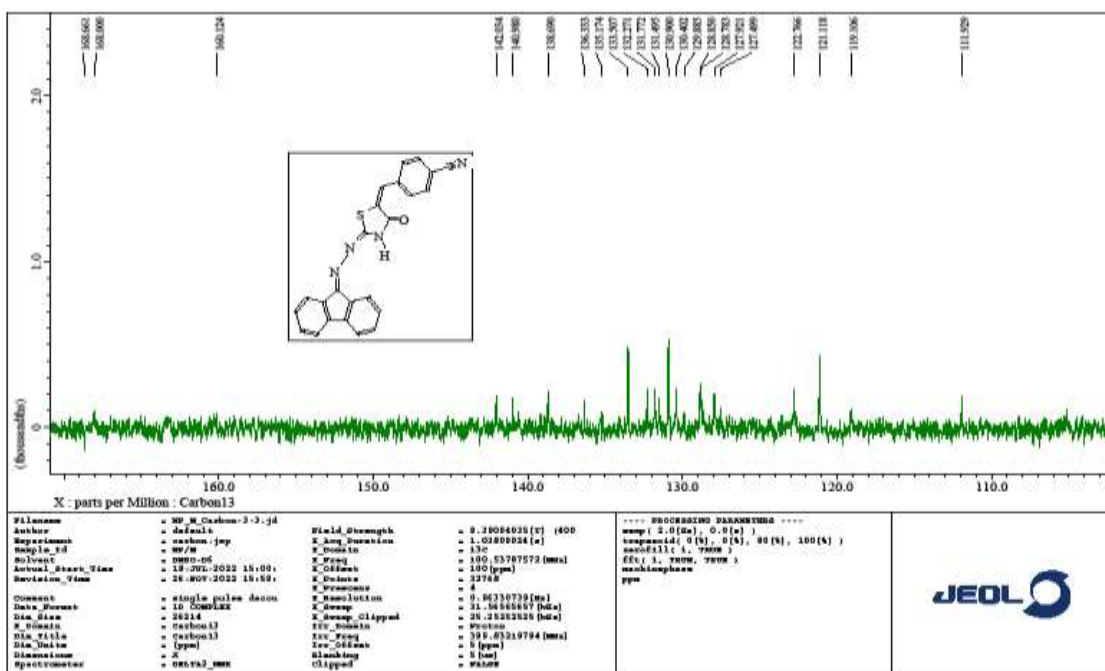

You created this PDF from an application that is not licensed to print to novaPDF printer (<http://www.novapdf.com>)

Fig.S44.  $^{13}\text{C}$  spectra of compound 5k

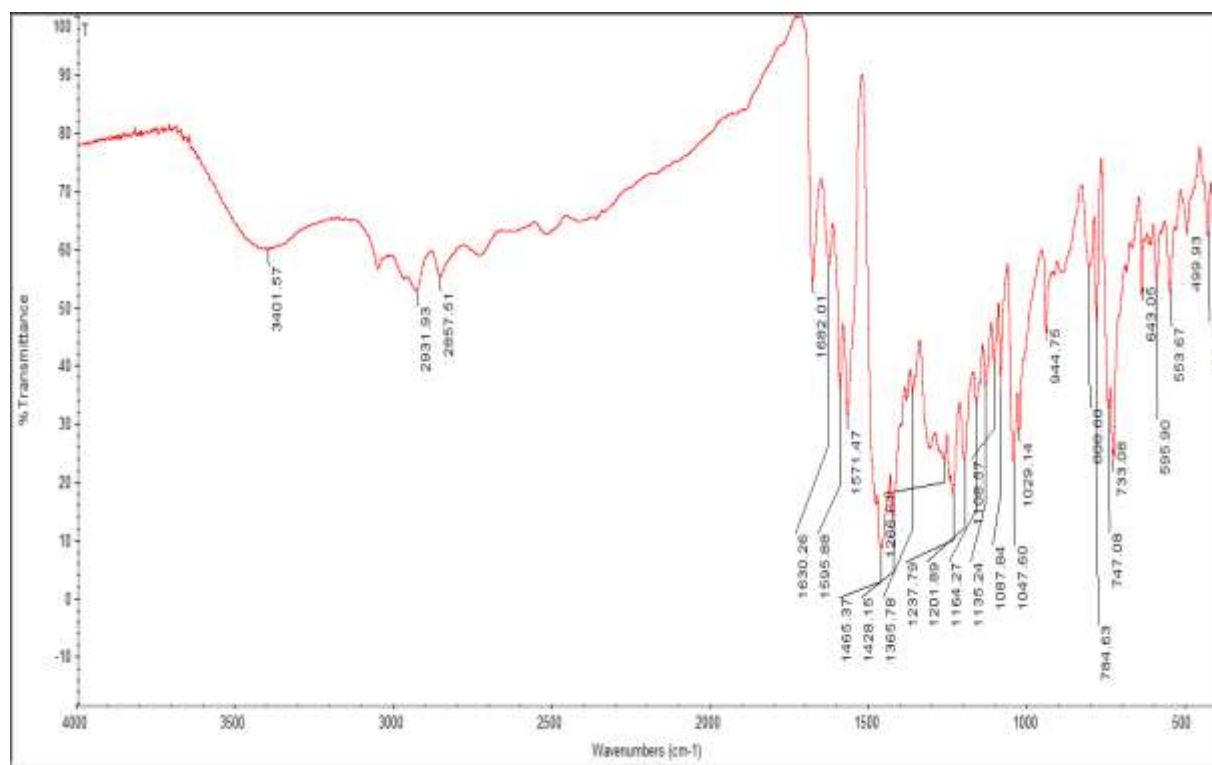

Fig.S45. FT-IR spectra of compound 5I

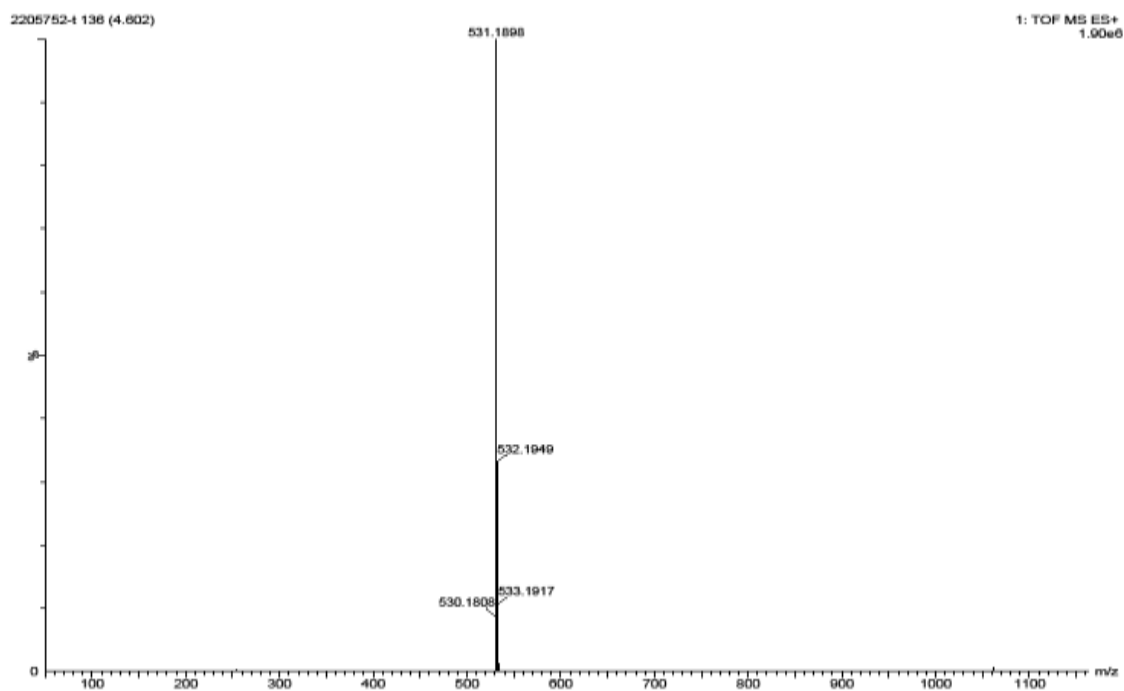

Fig.S46. Mass spectra of compound 5I





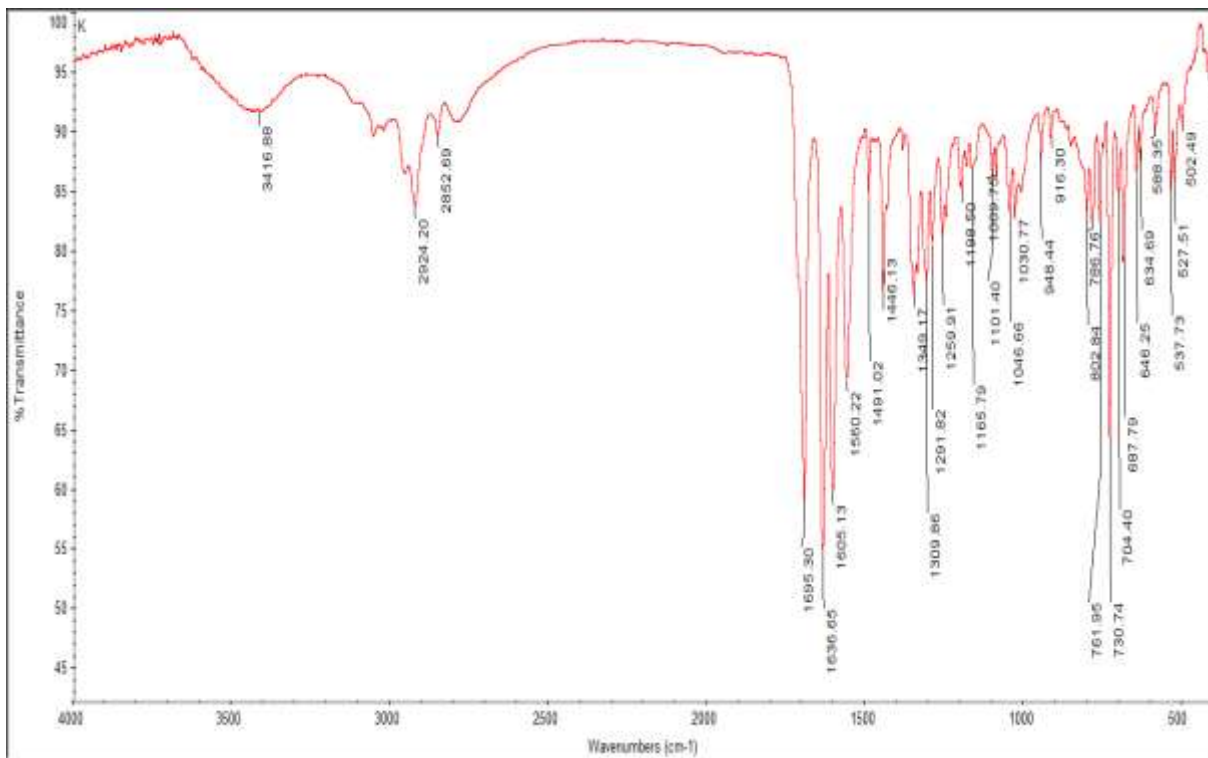

Fig.S49. FT-IR spectra of compound 5m

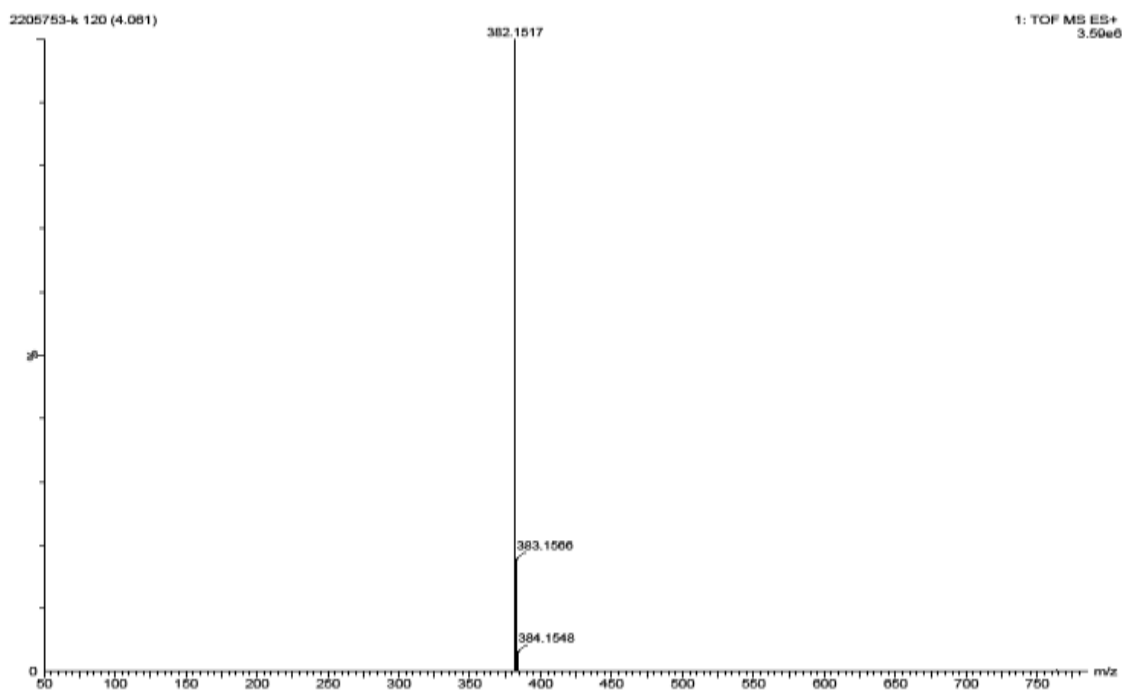

Fig.S50. Mass spectra of compound 5m

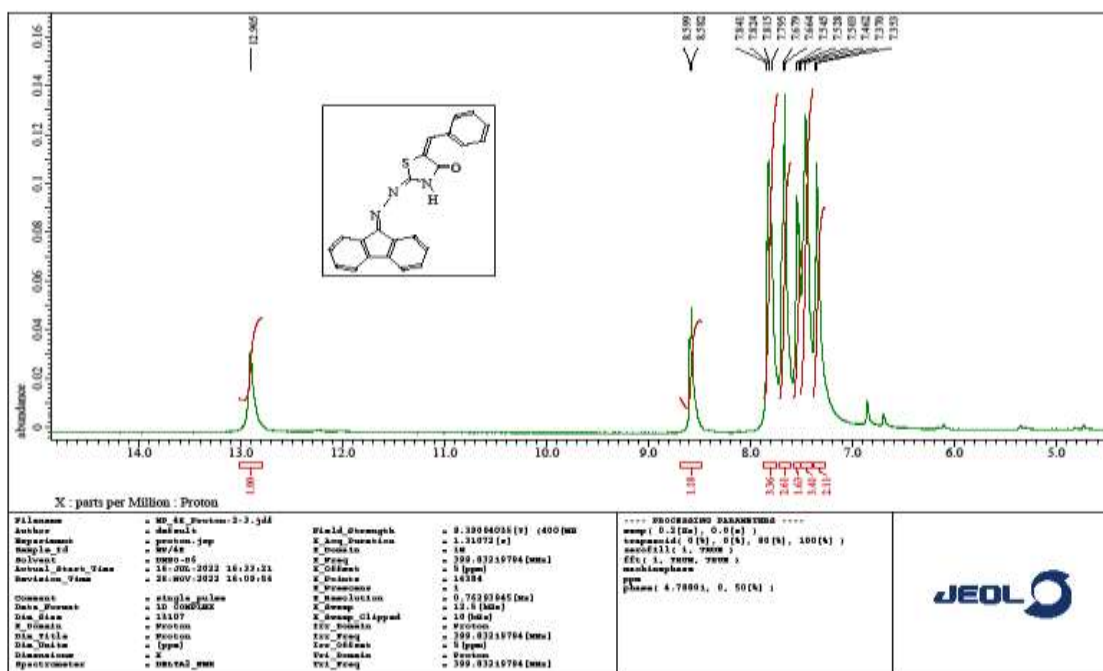

You created this PDF from an application that is not licensed to print to novaPDF printer (<http://www.novapdf.com>)

Fig.S51. <sup>1</sup>H spectra of compound 5m

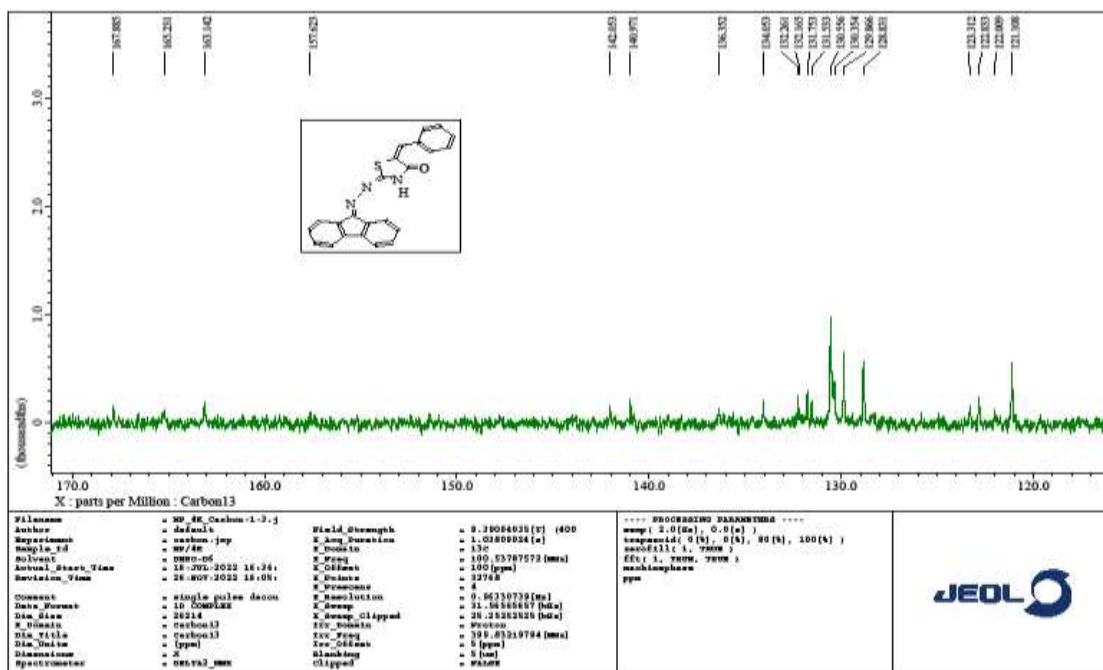

You created this PDF from an application that is not licensed to print to novaPDF printer (<http://www.novapdf.com>)

Fig.S52. <sup>13</sup>C spectra of compound 5m

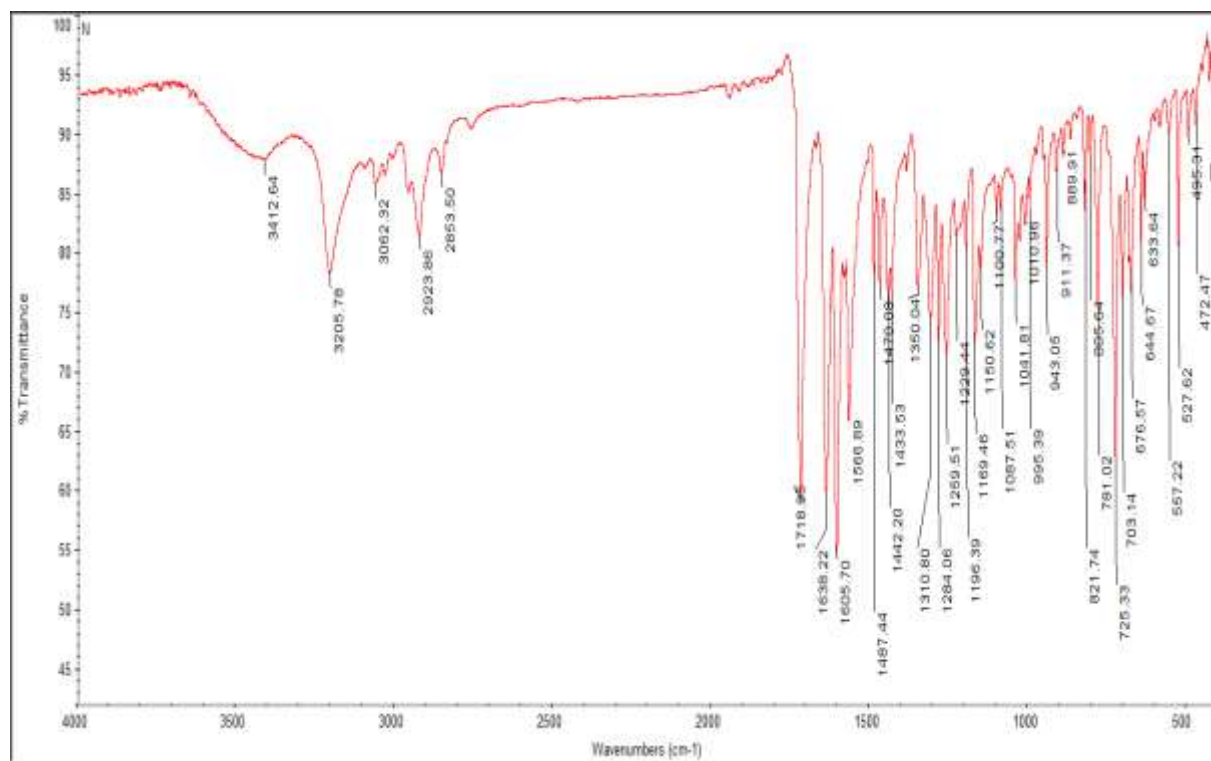

Fig.S53. FT-IR spectra of compound 5n

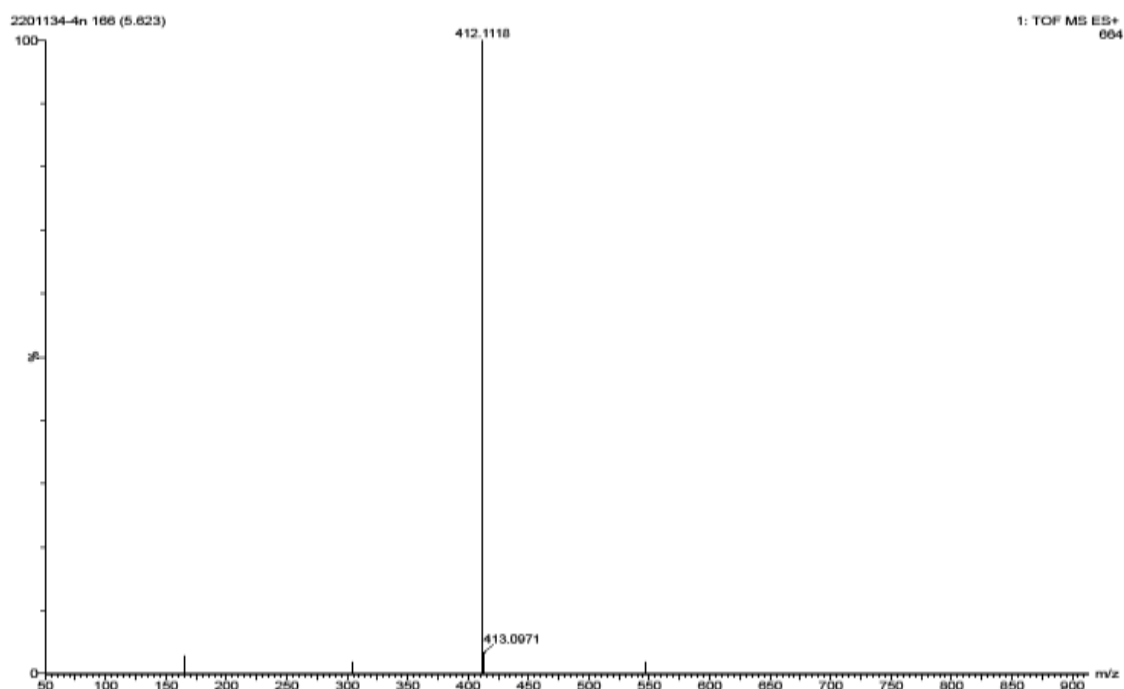

Fig.S54. Mass spectra of compound 5n

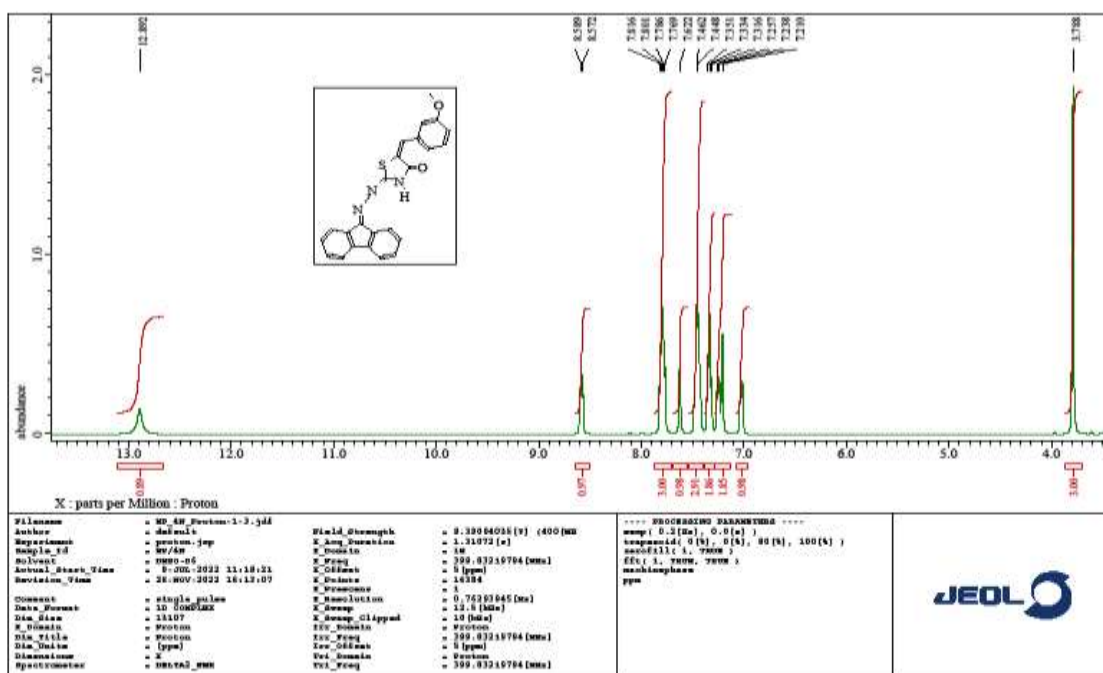

You created this PDF from an application that is not licensed to print to novaPDF printer (<http://www.novapdf.com>)

Fig.S55. <sup>1</sup>H spectra of compound 5n

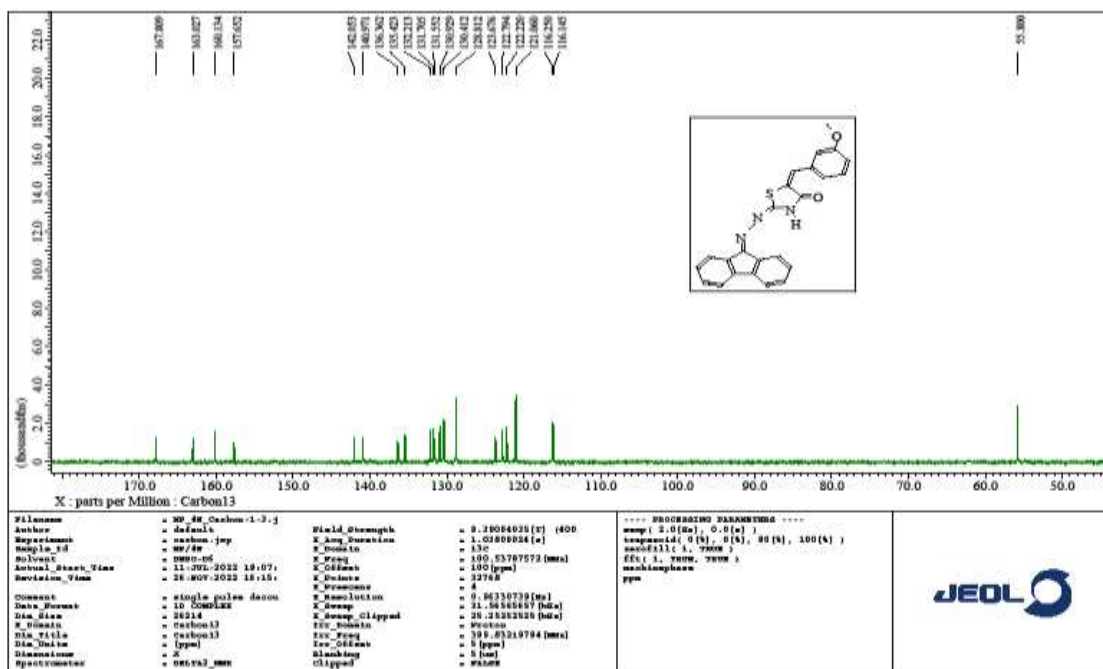

You created this PDF from an application that is not licensed to print to novaPDF printer (<http://www.novapdf.com>)

Fig.S56. <sup>13</sup>C spectra of compound 5n

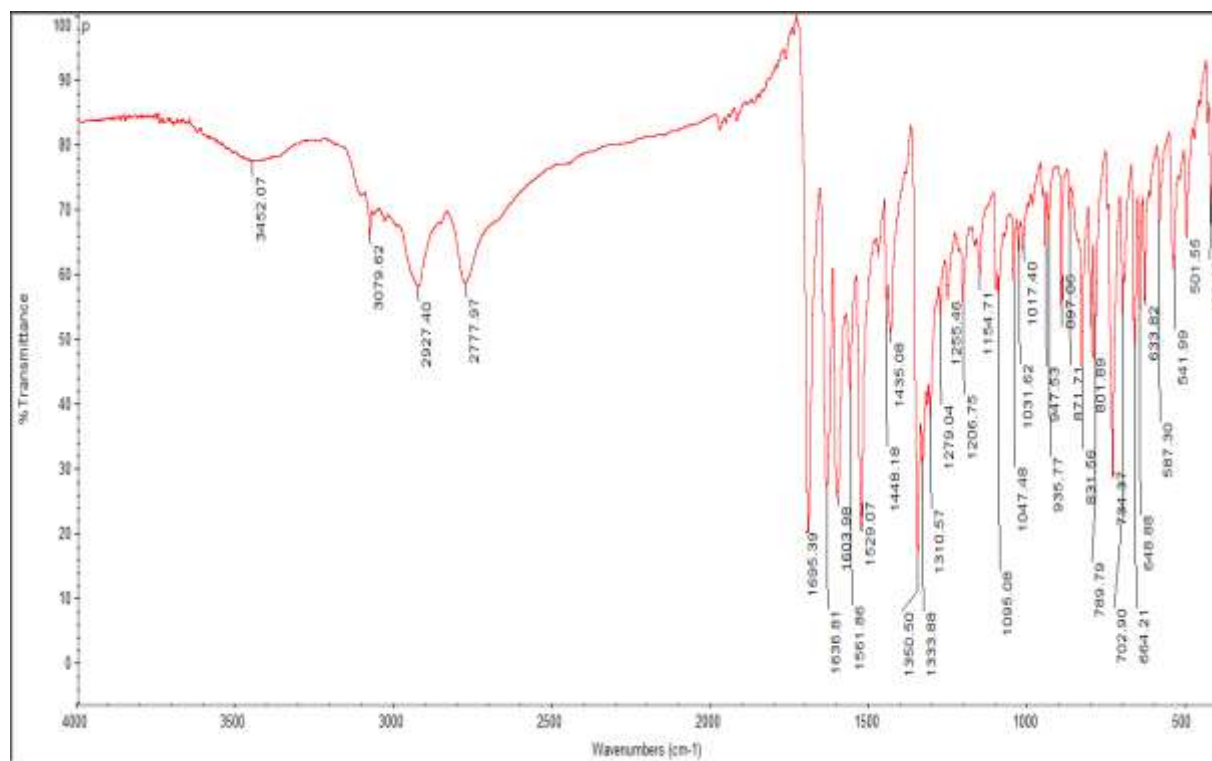

Fig.S57. FT-IR spectra of compound 5p

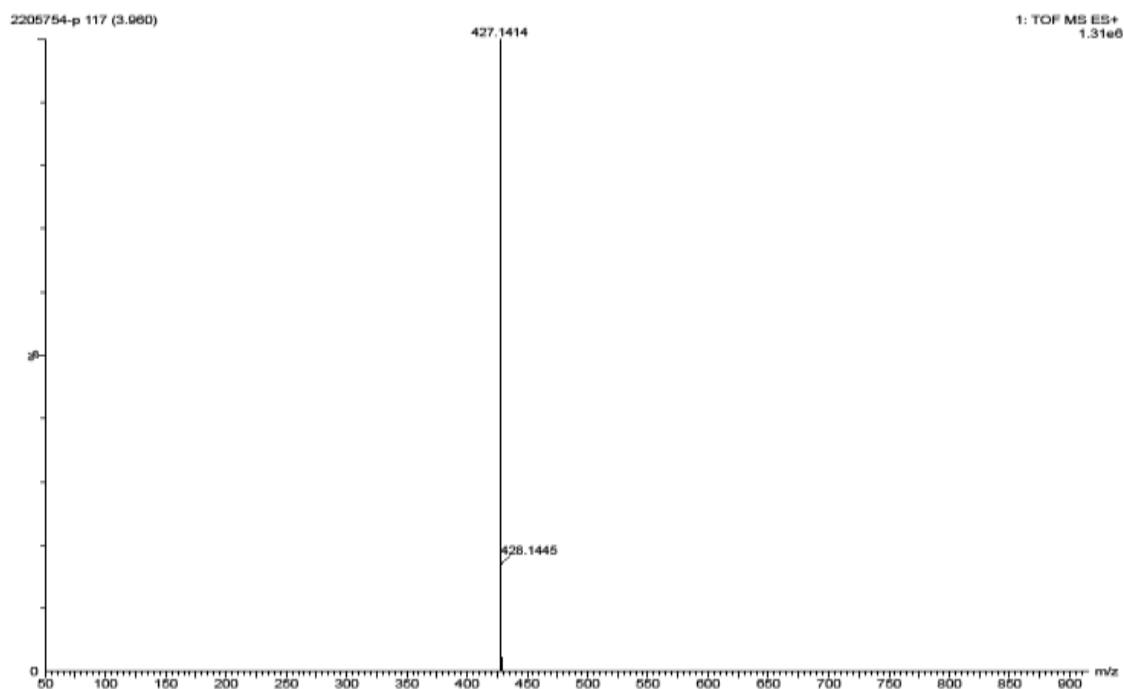

Fig.S58. Mass spectra of compound 5p

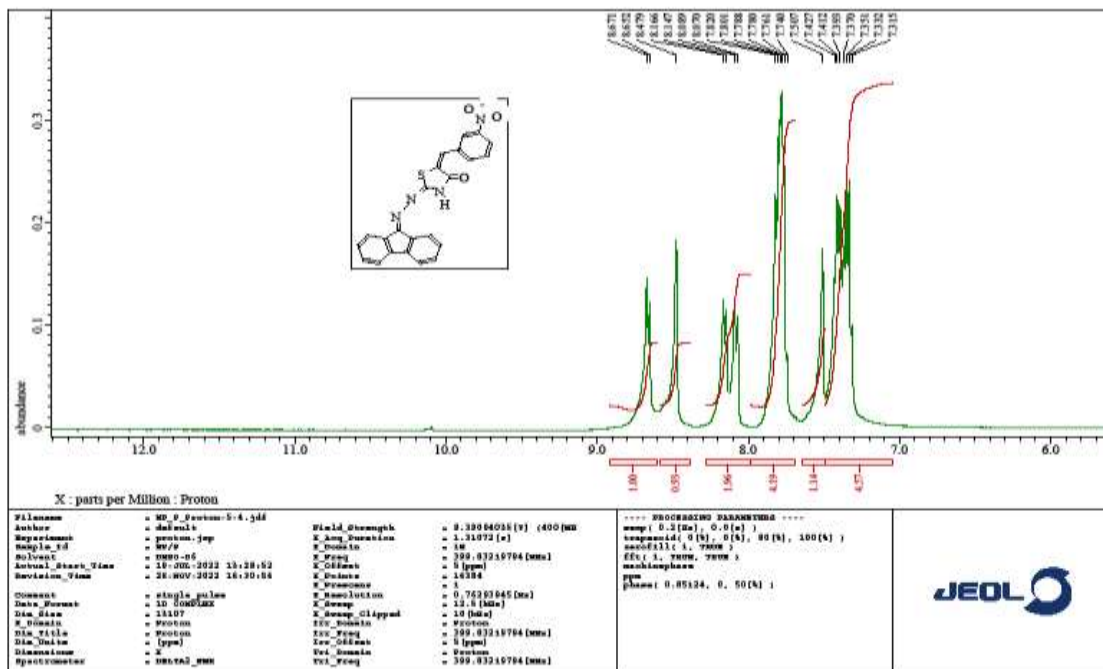

Fig.S59. <sup>1</sup>H spectra of compound 5p

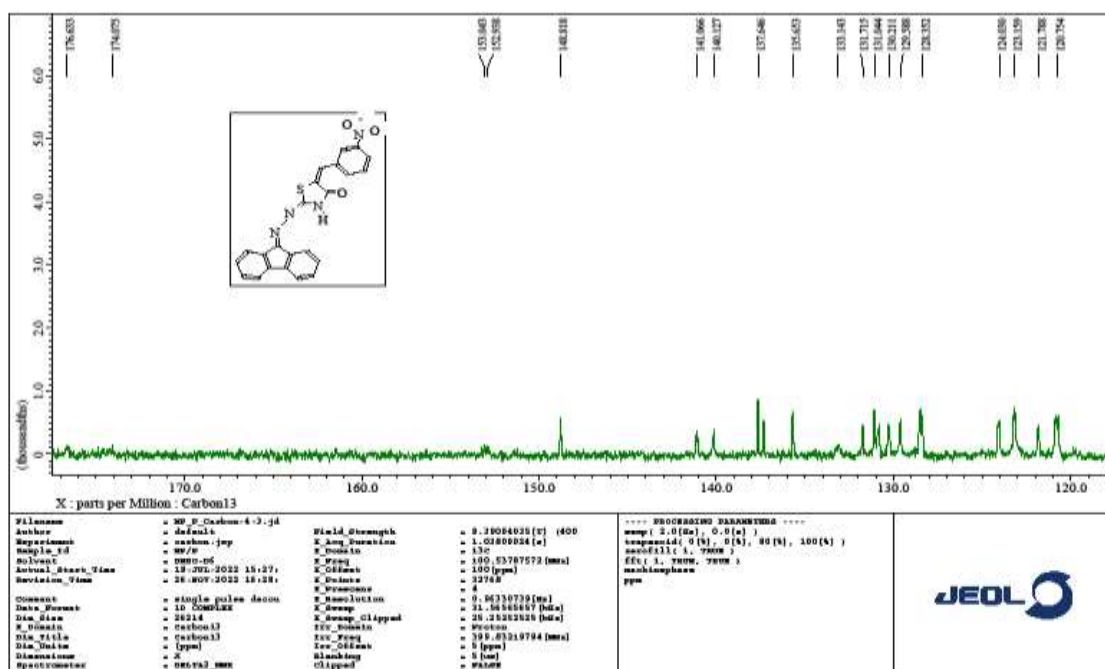

Fig.S60. <sup>13</sup>C spectra of compound 5p

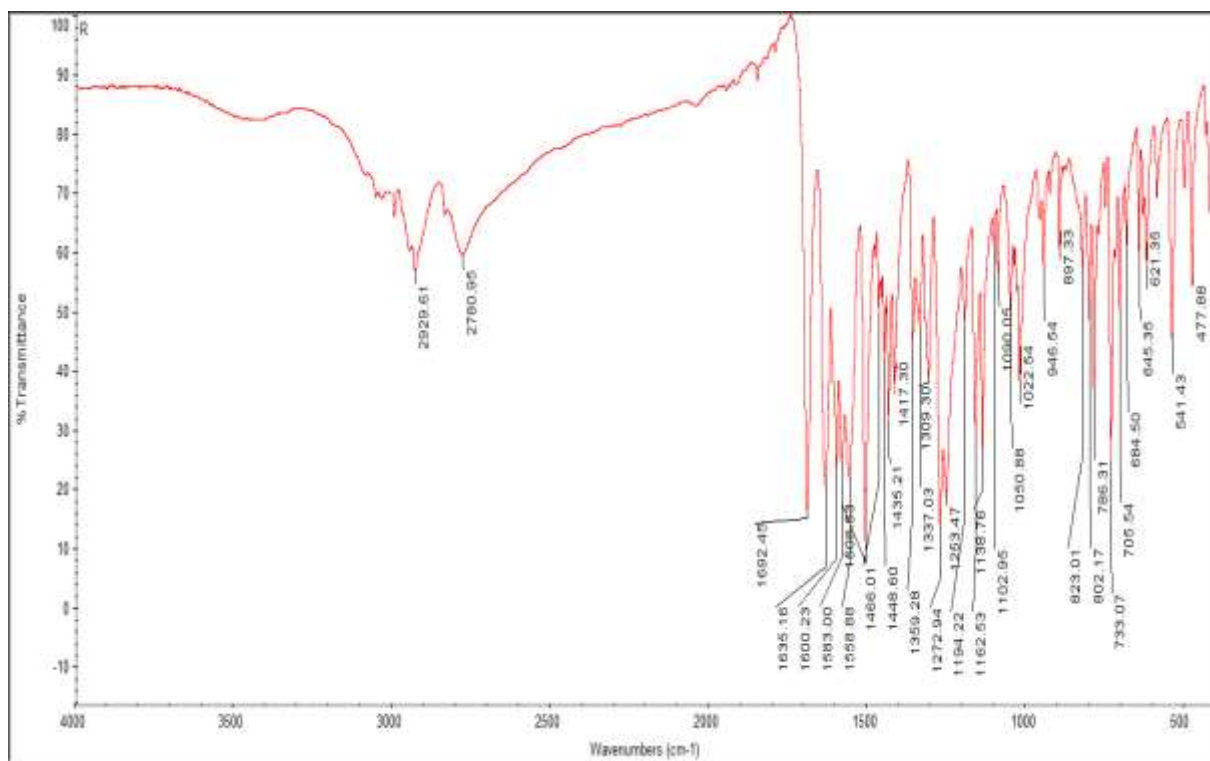

Fig.S61. FT-IR spectra of compound 5r

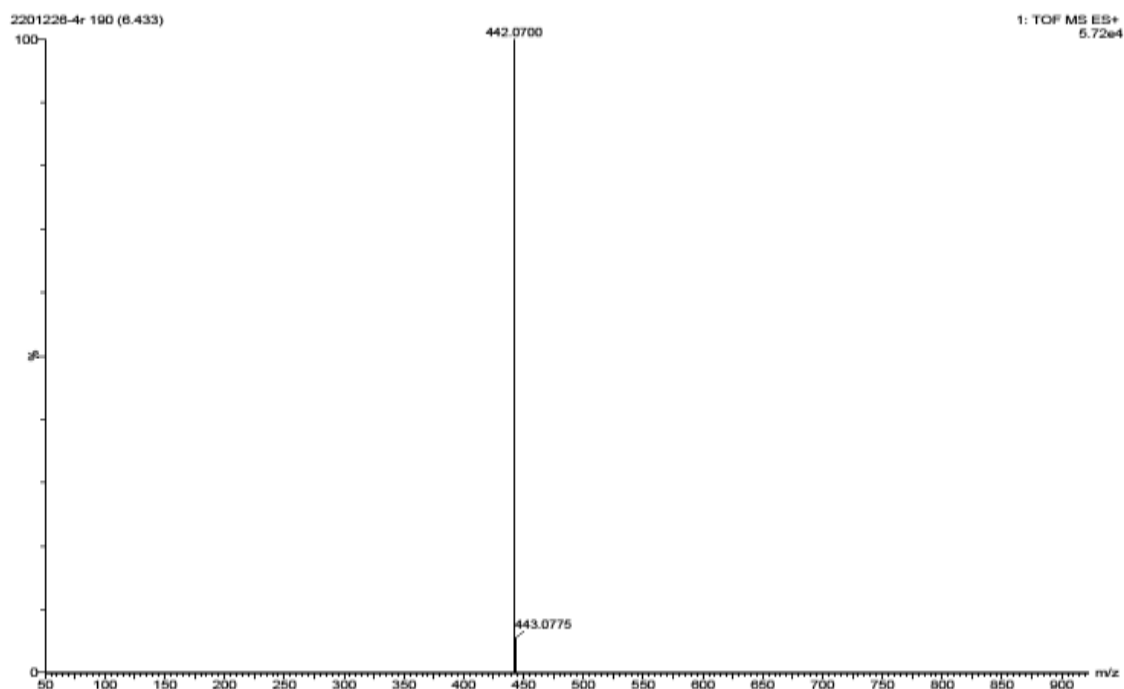

Fig.S62. Mass spectra of compound 5r

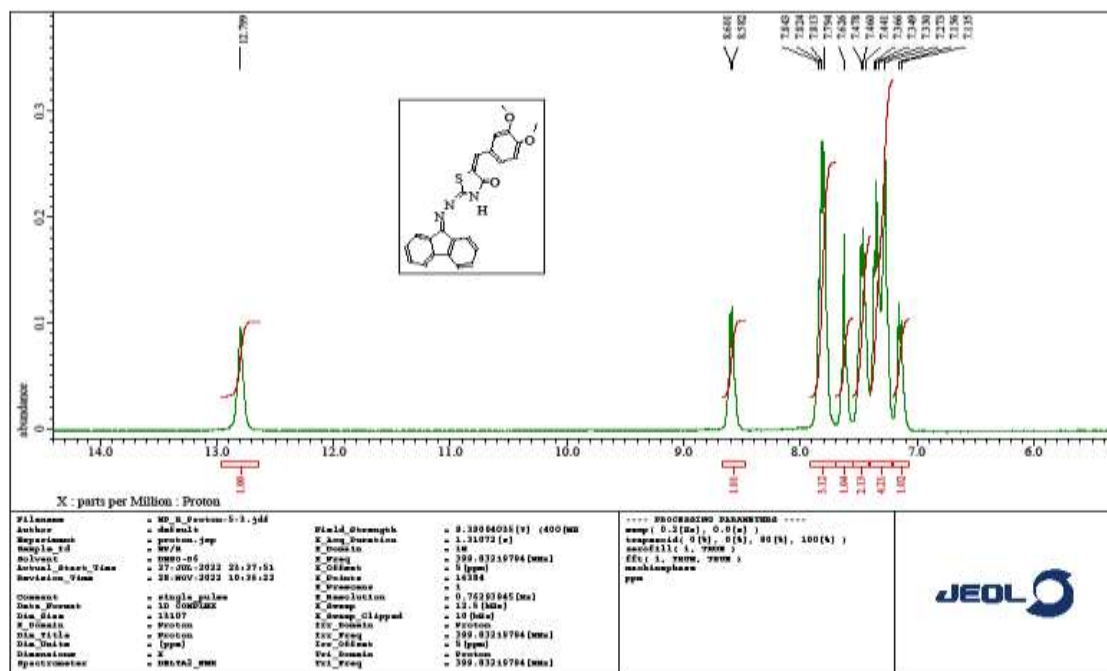

You created this PDF from an application that is not licensed to print to novaPDF printer (<http://www.novapdf.com>)

Fig.S63.  $^1\text{H}$  spectra of compound 5r

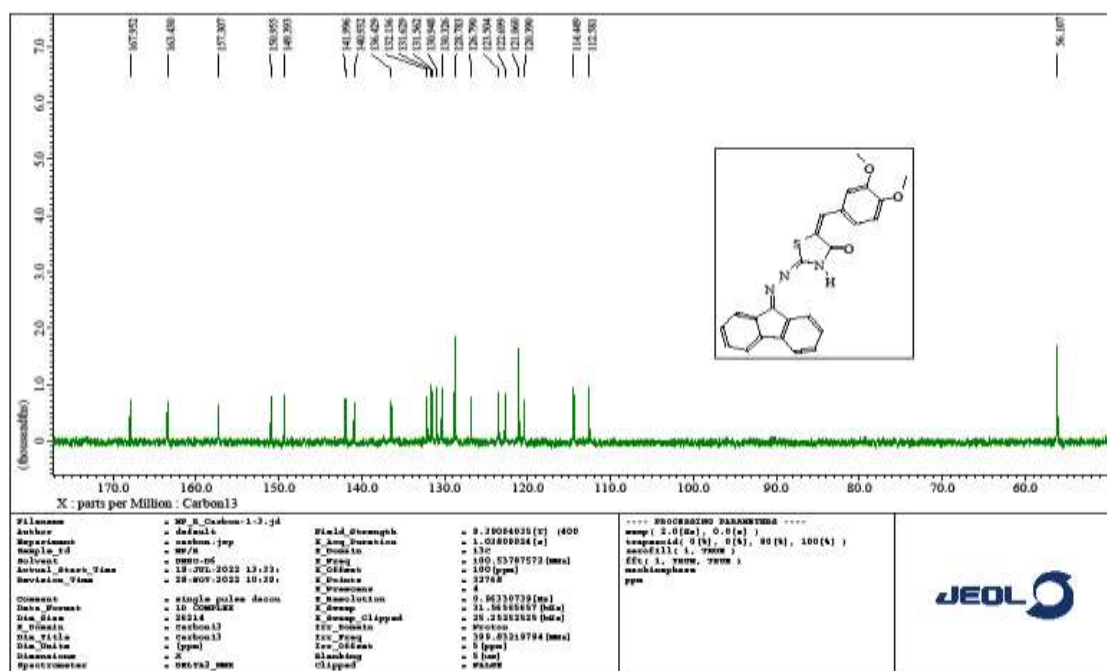

You created this PDF from an application that is not licensed to print to novaPDF printer (<http://www.novapdf.com>)

Fig.S64.  $^{13}\text{C}$  spectra of compound 5r



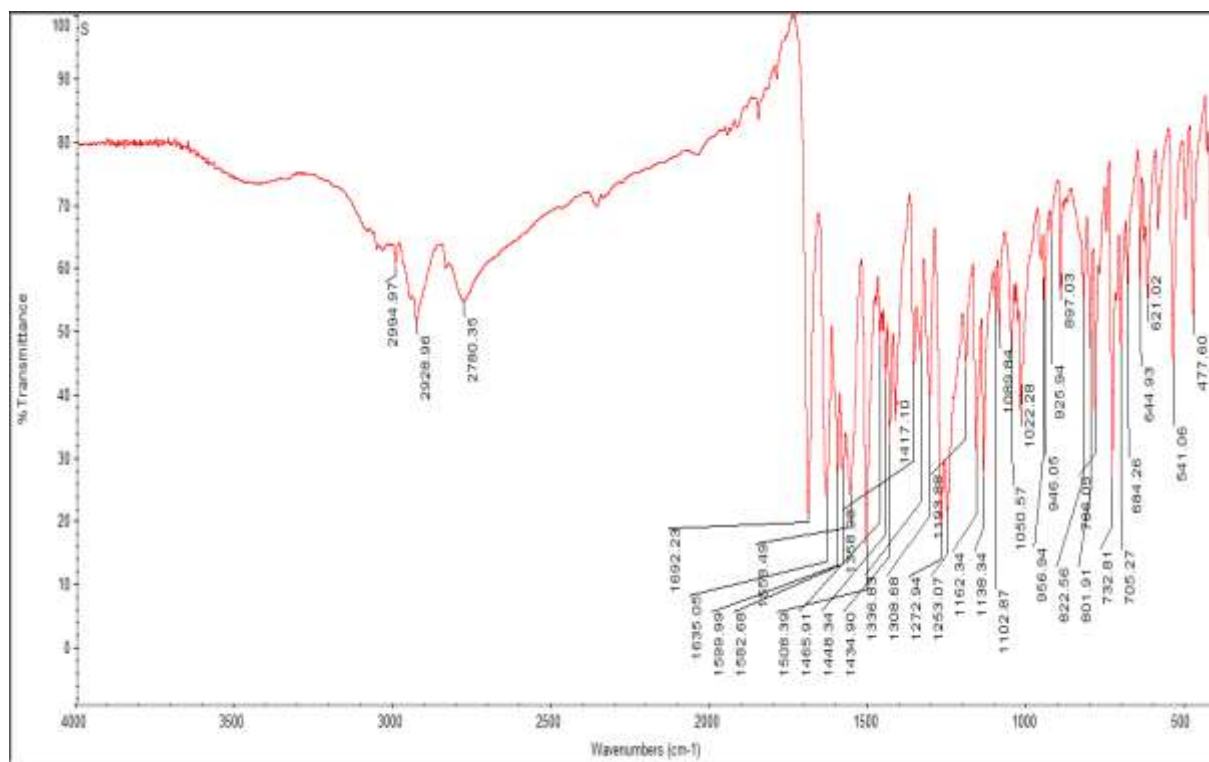

Fig.S65. FT-IR spectra of compound 5s

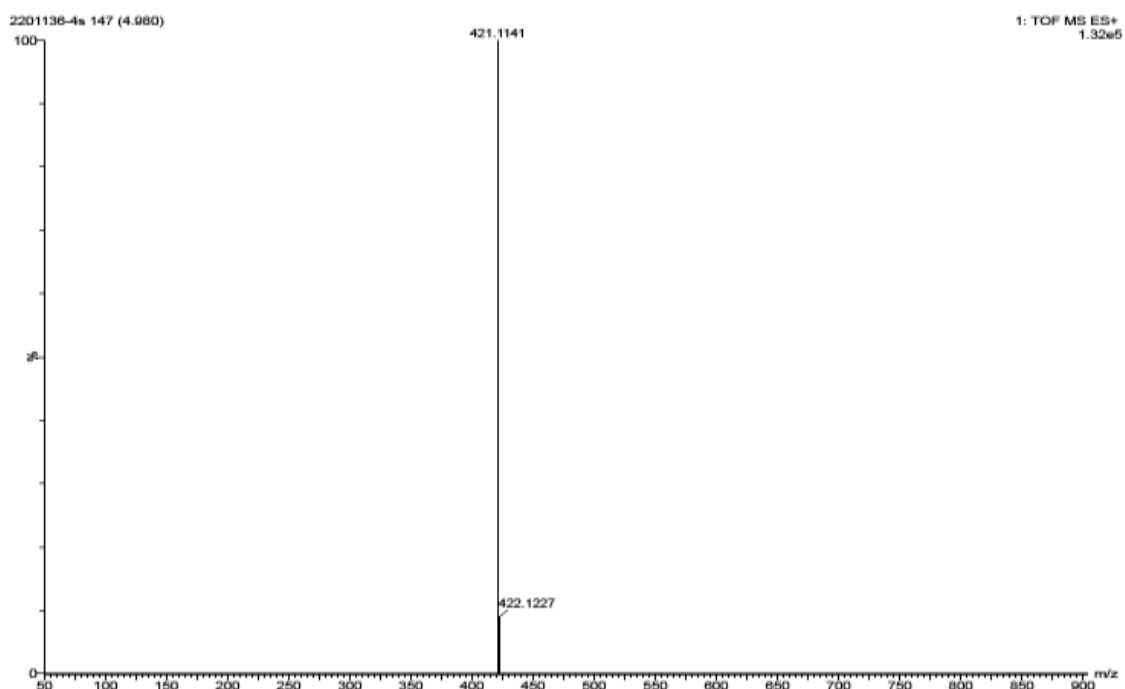

Fig.S66. Mass spectra of compound 5s

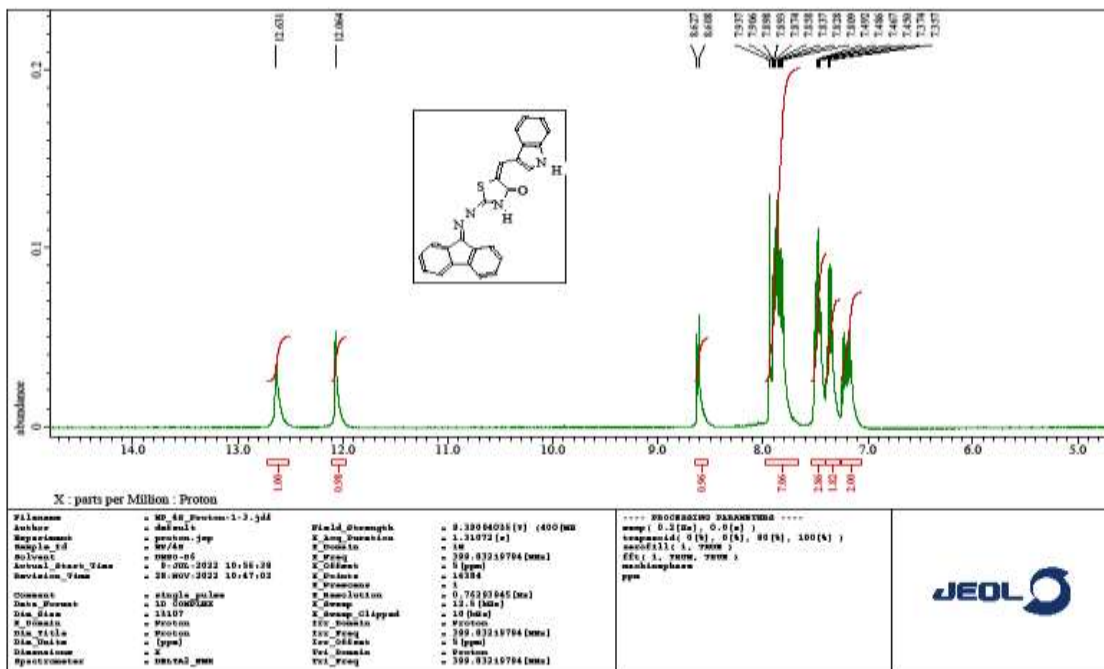

You created this PDF from an application that is not licensed to print to novaPDF printer (<http://www.novapdf.com>)

Fig.S67.  $^1\text{H}$  spectra of compound 5s

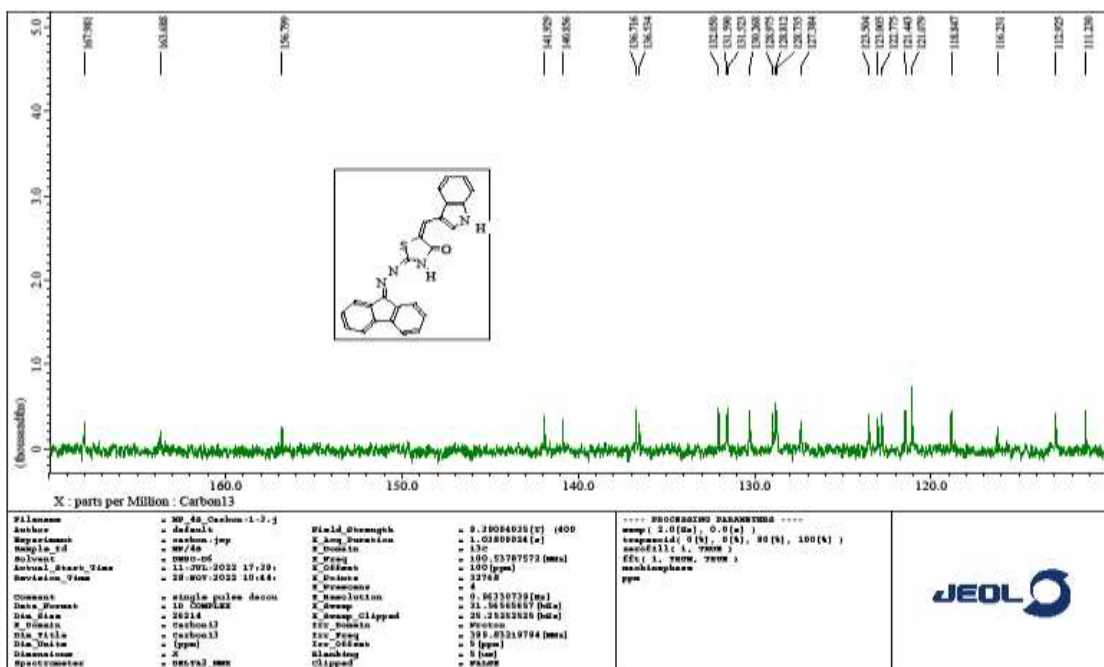

You created this PDF from an application that is not licensed to print to novaPDF printer (<http://www.novapdf.com>)

Fig.S68.  $^{13}\text{C}$  spectra of compound 5s

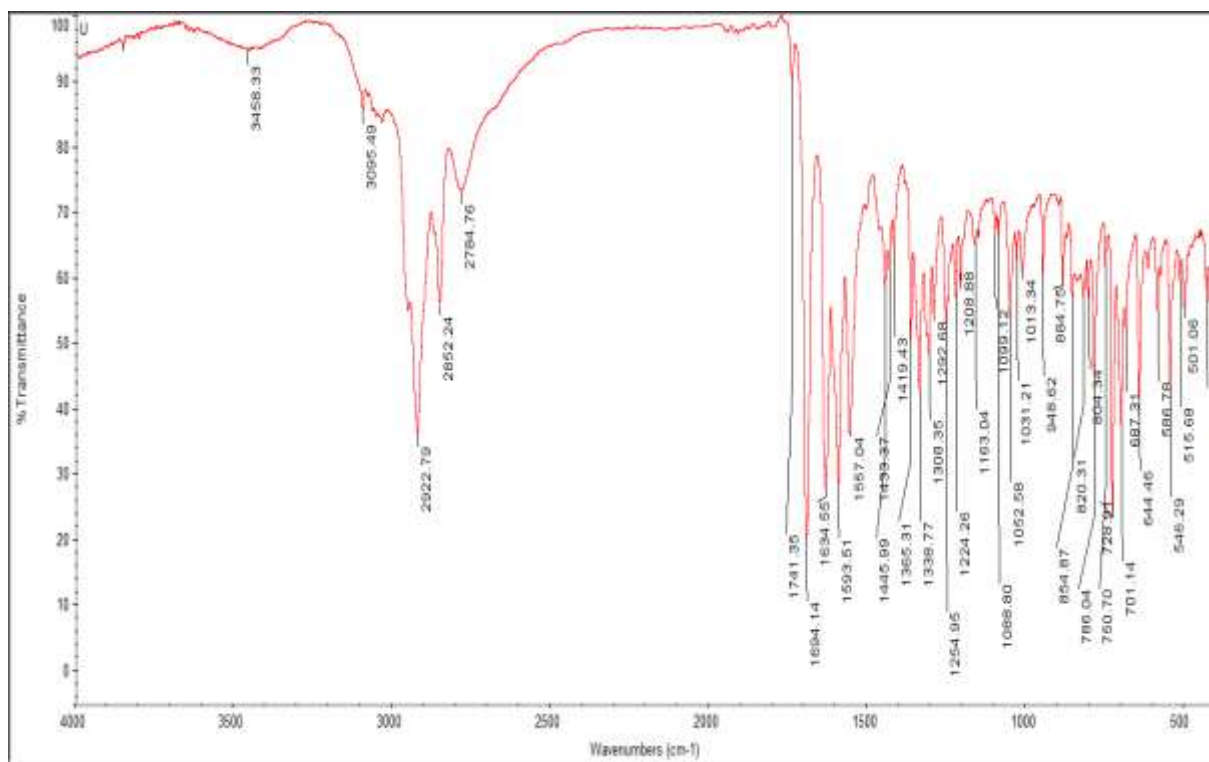

Fig.S69. FT-IR spectra of compound 5u

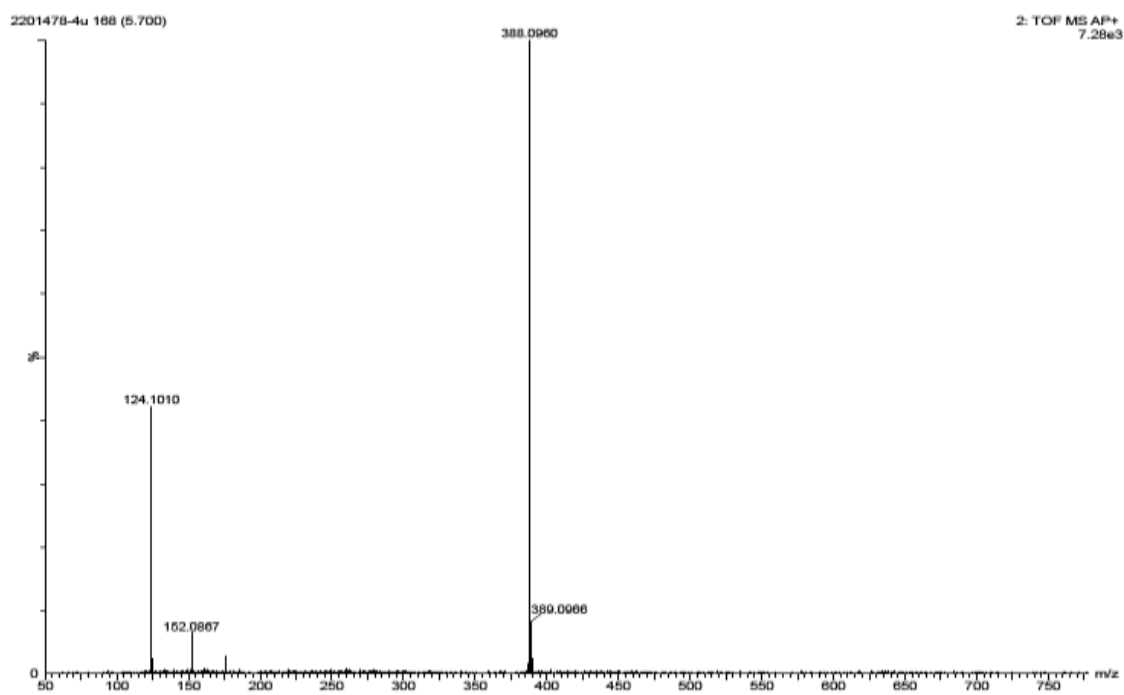

Fig.S70. Mass spectra of compound 5u

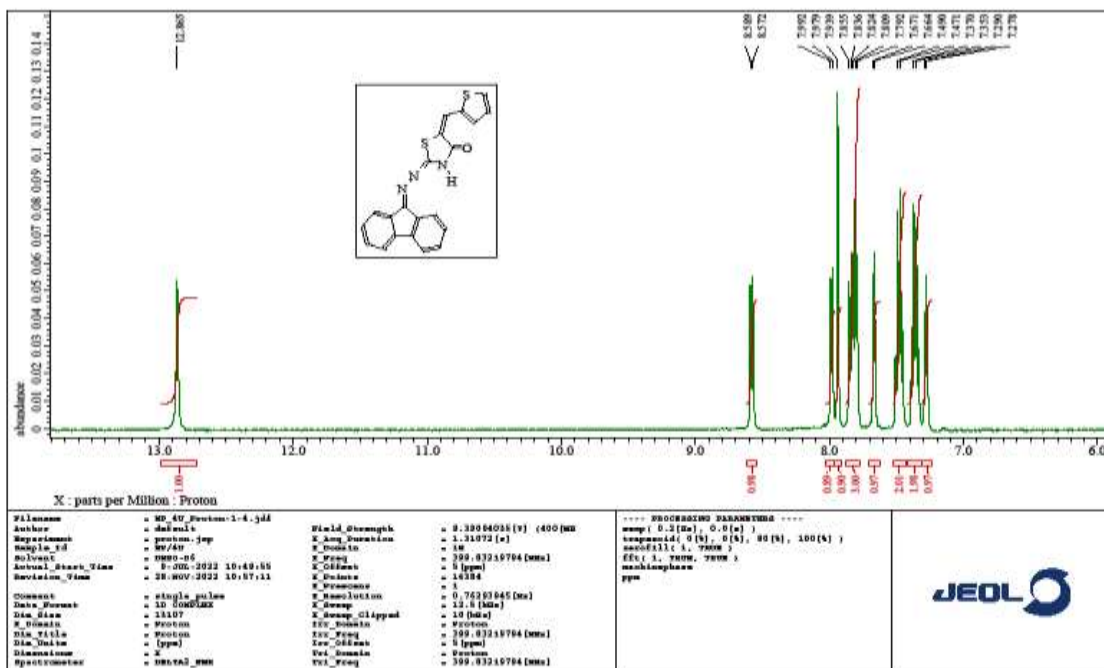

You created this PDF from an application that is not licensed to print to novaPDF printer (<http://www.novapdf.com>)

Fig.S71. <sup>1</sup>H spectra of compound 5u

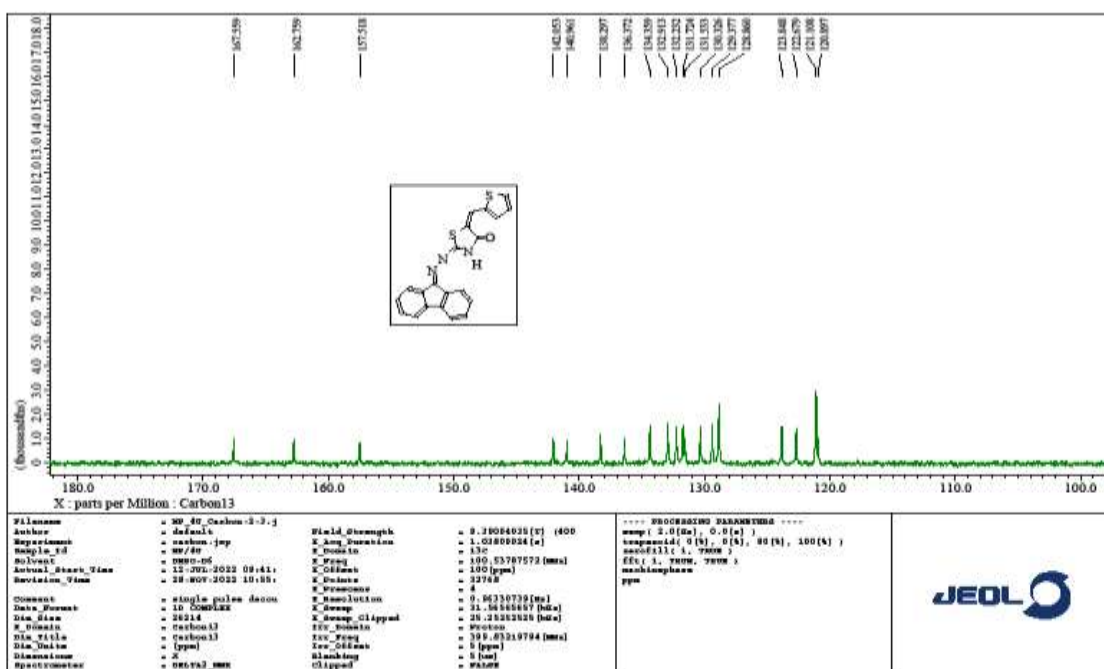

You created this PDF from an application that is not licensed to print to novaPDF printer (<http://www.novapdf.com>)

Fig.S72. <sup>13</sup>C spectra of compound 5u

**Table S1. Selected geometric parameters (Å, °) (bond lengths, bond angles and torsion angles) for compound 5s**

|             |             |             |             |
|-------------|-------------|-------------|-------------|
| S1—C16      | 1.752 (2)   | C1—C2       | 1.481 (3)   |
| S1—C14      | 1.748 (2)   | C13—C12     | 1.376 (3)   |
| O1—C15      | 1.229 (2)   | C13—C8      | 1.398 (3)   |
| N2—N1       | 1.396 (3)   | C12—C11     | 1.386 (3)   |
| N2—C14      | 1.286 (3)   | C11—C10     | 1.384 (4)   |
| N1—C1       | 1.288 (3)   | C10—C9      | 1.374 (4)   |
| N3—C14      | 1.367 (3)   | C9—C8       | 1.384 (3)   |
| N3—C15      | 1.366 (3)   | C8—C7       | 1.467 (3)   |
| C22—C21     | 1.391 (3)   | C7—C2       | 1.405 (3)   |
| C22—C23     | 1.366 (3)   | C7—C6       | 1.383 (3)   |
| C21—C20     | 1.377 (3)   | C2—C3       | 1.381 (3)   |
| C20—C19     | 1.392 (3)   | C3—C4       | 1.386 (3)   |
| C19—C18     | 1.445 (3)   | C4—C5       | 1.381 (4)   |
| C19—C24     | 1.405 (3)   | C5—C6       | 1.380 (4)   |
| C18—C17     | 1.436 (3)   | C25—N4      | 1.352 (3)   |
| C18—C25     | 1.381 (3)   | N4—C24      | 1.373 (3)   |
| C17—C16     | 1.344 (3)   | C24—C23     | 1.382 (3)   |
| C16—C15     | 1.471 (3)   | O2—C27      | 1.389 (3)   |
| C1—C13      | 1.474 (3)   | C26—C27     | 1.419 (4)   |
|             |             |             |             |
| C14—S1—C16  | 90.89 (10)  | C10—C11—C12 | 120.8 (3)   |
| C14—N2—N1   | 109.15 (18) | C9—C10—C11  | 121.1 (3)   |
| C1—N1—N2    | 115.26 (19) | C10—C9—C8   | 118.6 (3)   |
| C15—N3—C14  | 116.82 (18) | C13—C8—C7   | 108.3 (2)   |
| C23—C22—C21 | 121.6 (2)   | C9—C8—C13   | 120.3 (2)   |
| C20—C21—C22 | 121.0 (2)   | C9—C8—C7    | 131.4 (2)   |
| C21—C20—C19 | 118.9 (2)   | C2—C7—C8    | 108.9 (2)   |
| C20—C19—C18 | 134.7 (2)   | C6—C7—C8    | 130.5 (2)   |
| C20—C19—C24 | 118.5 (2)   | C6—C7—C2    | 120.5 (2)   |
| C24—C19—C18 | 106.78 (19) | C7—C2—C1    | 107.84 (19) |
| C17—C18—C19 | 125.4 (2)   | C3—C2—C1    | 132.2 (2)   |
| C25—C18—C19 | 105.94 (19) | C3—C2—C7    | 119.9 (2)   |
| C25—C18—C17 | 128.6 (2)   | C2—C3—C4    | 119.2 (2)   |
| C16—C17—C18 | 128.8 (2)   | C5—C4—C3    | 120.5 (2)   |

|                 |              |                 |             |
|-----------------|--------------|-----------------|-------------|
| C17—C16—S1      | 126.67 (17)  | C6—C5—C4        | 121.1 (2)   |
| C17—C16—C15     | 122.7 (2)    | C5—C6—C7        | 118.8 (2)   |
| C15—C16—S1      | 110.64 (15)  | O1—C15—N3       | 123.01 (19) |
| N2—C14—S1       | 125.88 (17)  | O1—C15—C16      | 126.9 (2)   |
| N2—C14—N3       | 122.6 (2)    | N3—C15—C16      | 110.10 (18) |
| N3—C14—S1       | 111.50 (15)  | N4—C25—C18      | 109.9 (2)   |
| N1—C1—C13       | 121.1 (2)    | C25—N4—C24      | 109.87 (19) |
| N1—C1—C2        | 132.7 (2)    | N4—C24—C19      | 107.53 (19) |
| C13—C1—C2       | 106.10 (19)  | N4—C24—C23      | 129.7 (2)   |
| C12—C13—C1      | 130.4 (2)    | C23—C24—C19     | 122.7 (2)   |
| C12—C13—C8      | 120.9 (2)    | C22—C23—C24     | 117.2 (2)   |
| C8—C13—C1       | 108.7 (2)    | O2—C27—C26      | 120.5 (3)   |
| C13—C12—C11     | 118.3 (2)    |                 |             |
|                 |              |                 |             |
| S1—C16—C15—O1   | 177.5 (2)    | C1—C13—C8—C7    | -2.2 (3)    |
| S1—C16—C15—N3   | -2.6 (2)     | C1—C2—C3—C4     | 177.6 (2)   |
| N2—N1—C1—C13    | -179.72 (19) | C13—C1—C2—C7    | -3.3 (2)    |
| N2—N1—C1—C2     | 3.7 (4)      | C13—C1—C2—C3    | 178.4 (3)   |
| N1—N2—C14—S1    | 1.6 (3)      | C13—C12—C11—C10 | 0.6 (4)     |
|                 |              |                 |             |
| N1—N2—C14—N3    | -178.20 (19) | C13—C8—C7—C2    | 0.1 (3)     |
| N1—C1—C13—C12   | 5.7 (4)      | C13—C8—C7—C6    | 179.6 (2)   |
| N1—C1—C13—C8    | -174.0 (2)   | C12—C13—C8—C9   | -2.2 (4)    |
| N1—C1—C2—C7     | 173.7 (2)    | C12—C13—C8—C7   | 178.1 (2)   |
| N1—C1—C2—C3     | -4.6 (5)     | C12—C11—C10—C9  | -1.5 (4)    |
| C22—C21—C20—C19 | -0.1 (4)     | C11—C10—C9—C8   | 0.5 (4)     |
| C21—C22—C23—C24 | 0.0 (4)      | C10—C9—C8—C13   | 1.3 (4)     |
| C21—C20—C19—C18 | 179.4 (2)    | C10—C9—C8—C7    | -179.0 (2)  |
| C21—C20—C19—C24 | -0.5 (3)     | C9—C8—C7—C2     | -179.7 (2)  |
| C20—C19—C18—C17 | 1.8 (4)      | C9—C8—C7—C6     | -0.2 (5)    |
| C20—C19—C18—C25 | 179.7 (3)    | C8—C13—C12—C11  | 1.2 (4)     |
| C20—C19—C24—N4  | -179.5 (2)   | C8—C7—C2—C1     | 2.1 (3)     |
| C20—C19—C24—C23 | 0.9 (4)      | C8—C7—C2—C3     | -179.4 (2)  |
| C19—C18—C17—C16 | -179.4 (2)   | C8—C7—C6—C5     | 179.8 (2)   |
| C19—C18—C25—N4  | 0.0 (3)      | C7—C2—C3—C4     | -0.5 (4)    |
| C19—C24—C23—C22 | -0.6 (4)     | C2—C1—C13—C12   | -176.9 (2)  |
| C18—C19—C24—N4  | 0.6 (3)      | C2—C1—C13—C8    | 3.4 (2)     |
| C18—C19—C24—C23 | -179.0 (2)   | C2—C7—C6—C5     | -0.7 (4)    |

|                 |            |                 |            |
|-----------------|------------|-----------------|------------|
| C18—C17—C16—S1  | 1.4 (4)    | C2—C3—C4—C5     | -0.3 (4)   |
| C18—C17—C16—C15 | -176.5 (2) | C3—C4—C5—C6     | 0.6 (4)    |
| C18—C25—N4—C24  | 0.4 (3)    | C4—C5—C6—C7     | -0.1 (4)   |
| C17—C18—C25—N4  | 177.9 (2)  | C6—C7—C2—C1     | -177.5 (2) |
| C17—C16—C15—O1  | -4.3 (4)   | C6—C7—C2—C3     | 1.0 (4)    |
| C17—C16—C15—N3  | 175.6 (2)  | C15—N3—C14—S1   | -0.9 (2)   |
| C16—S1—C14—N2   | 179.6 (2)  | C15—N3—C14—N2   | 178.9 (2)  |
| C16—S1—C14—N3   | -0.63 (17) | C25—C18—C17—C16 | 3.2 (4)    |
| C14—S1—C16—C17  | -176.3 (2) | C25—N4—C24—C19  | -0.6 (3)   |
| C14—S1—C16—C15  | 1.82 (17)  | C25—N4—C24—C23  | 179.0 (3)  |
| C14—N2—N1—C1    | -173.1 (2) | N4—C24—C23—C22  | 179.8 (2)  |
| C14—N3—C15—O1   | -177.8 (2) | C24—C19—C18—C17 | -178.3 (2) |
| C14—N3—C15—C16  | 2.2 (3)    | C24—C19—C18—C25 | -0.4 (3)   |
| C1—C13—C12—C11  | -178.5 (2) | C23—C22—C21—C20 | 0.3 (4)    |
| C1—C13—C8—C9    | 177.6 (2)  |                 |            |

**Fig S73.** Angle between the plane of compound **5s**

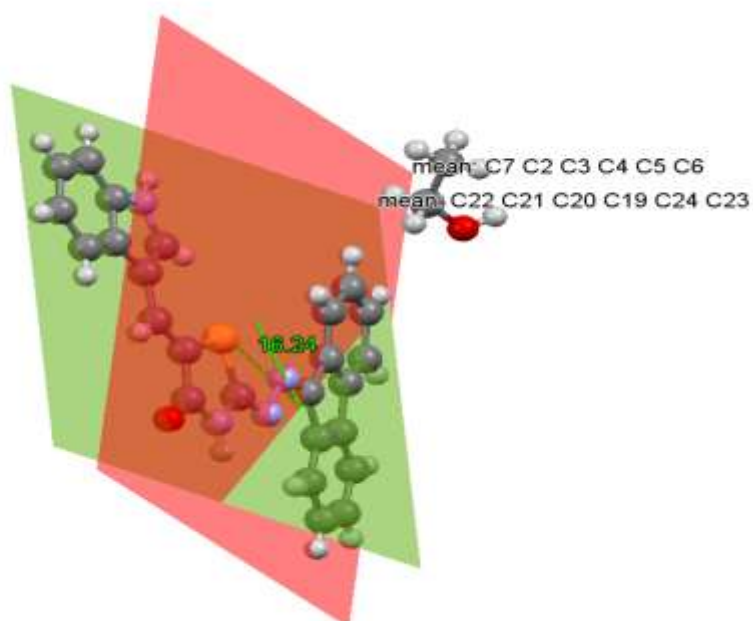

**Fig S74. Dihedral angle of compound 5s**

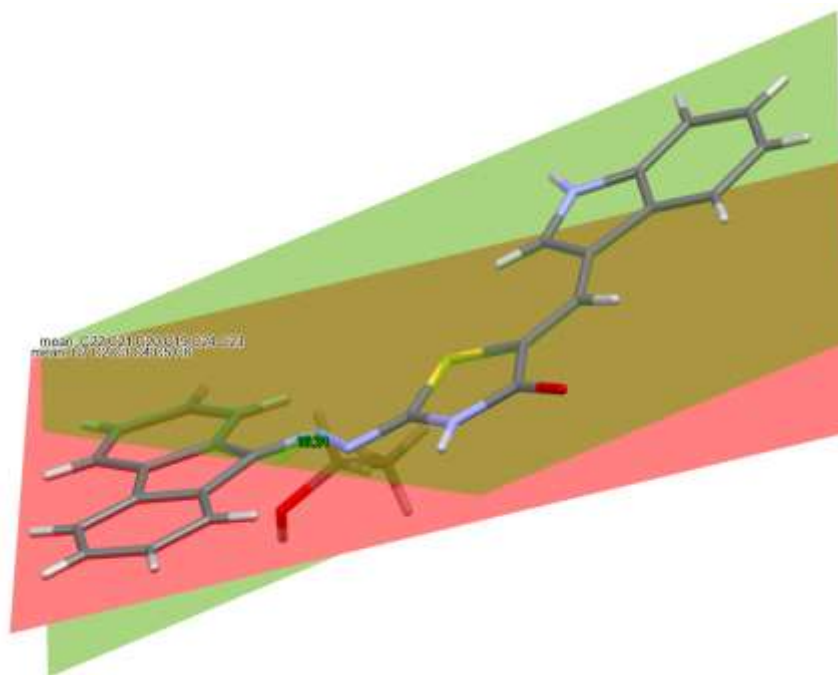

Supplement: d3nj01922e1.pdf [file d3nj01922e1.pdf]
